1 **Global genome decompaction leads to stochastic activation of gene**  
2 **expression as a first step toward fate commitment in human hematopoietic**  
3 **stem cells.**

4

5 Parmentier Romuald<sup>1\*</sup>, Moussy Alice<sup>1\*</sup>, Chantalat Sophie<sup>2\*</sup>, Racine Laëtitia<sup>1\*</sup>, Sudharshan Ravi<sup>3,4</sup>,  
6 Papili Gao Nan<sup>4</sup>, Stockholm Daniel<sup>1</sup>, Corre Guillaume<sup>5</sup>, Fourel Geneviève<sup>6,7</sup>, Deleuze Jean-  
7 François<sup>2</sup>, Gunawan Rudiyanto<sup>3</sup>, Paldi Andras<sup>1</sup>.

8

9 <sup>1</sup>Ecole Pratique des Hautes Etudes, PSL Research University, St-Antoine Research Center, Inserm  
10 U938, 34 rue Crozatier, 75012, Paris, France

11 <sup>2</sup> Centre National de Recherche en Génomique Humaine, CEA, 91000 Evry, France

12 <sup>3</sup>Department of Chemical and Biological Engineering, University, Buffalo, NY 14260, USA

13 <sup>4</sup>Institute for Chemical and Bioengineering, ETH Zurich, 8093 Zurich, Switzerland

14 <sup>5</sup>Genethon; 1bis rue de l'International, 91001 Evry, France

15 <sup>6</sup> Laboratory of Biology and Modelling of the Cell, University of Lyon, ENS de Lyon, University  
16 of Claude Bernard, CNRS UMR 5239, Inserm U1210, Lyon, France.

17 <sup>7</sup> Centre Blaise Pascal, ENS de Lyon, Lyon, France.

18

19 \* Equal contribution

20

21 Corresponding author: [andras.paldi@ephe.psl.eu](mailto:andras.paldi@ephe.psl.eu)

22 Keywords: hematopoietic stem cell, stochastic, fate decision, chromatin, single cell

## 23 **Summary**

24 When human cord blood derived CD34+ cells are induced to differentiate *in vitro*, they undergo  
25 rapid and dynamic morphological and molecular transformations that are critical for fate  
26 commitment. Using ATAC-seq and single-cell RNA sequencing, we detected two phases in this  
27 process. In the first phase, we observed a rapid and global chromatin opening that makes most of  
28 the gene promoters in the genome accessible, followed by widespread upregulation of gene  
29 transcription and a concomitant increase in the cell-to-cell variability of gene expression. The  
30 second phase is marked by a slow chromatin closure and a subsequent overall downregulation of  
31 gene transcription and emergence of coherent expression profiles corresponding to distinct cell  
32 subpopulations. These observations are consistent with a model based on the spontaneous  
33 probabilistic organization of the cellular process of fate commitment.

## 34 **Introduction**

35 Fate commitment of hematopoietic cells has been widely studied and is commonly considered as  
36 a paradigm of cell differentiation in general. Traditionally, differentiation is believed to proceed  
37 through a series of binary fate decisions under the action of key instructive factors inducing specific  
38 changes in the cell that lead to stepwise switches of the expression profiles at critical decision points  
39 (Kawamoto and Katsura, 2009). The typical representation of this process is a hierarchical decision  
40 tree. Such a strict hierarchical process must imply tight regulation of gene expression. A number  
41 of genes that play a key role in the process have been identified (Sive and Göttgens, 2014). But  
42 recent observations challenge the assumption of a strictly ordered process. Single-cell gene  
43 expression studies demonstrated that, soon after their stimulation for differentiation, multipotent  
44 CD34+ cells go through a phase of disordered gene expression called “multilineage primed” phase  
45 characterized by concomitant expression of genes typical for alternative lineages (Hu et al., 1997;  
46 Moussy et al., 2017; Nimmo et al., 2015; Pina et al., 2012). Other studies demonstrated that  
47 hematopoietic stem cells (HSC) gradually acquire lineage characteristics along multiple directions  
48 without passing through discrete hierarchically organized and demarcated progenitor populations  
49 (Velten et al., 2017). Instead, unilineage-restricted cells emerge directly from a continuum of low-  
50 primed undifferentiated hematopoietic stem and progenitor cells (Velten et al., 2017). This phase  
51 is accompanied by instabilities and fluctuation of the cell transcriptome, morphology and dynamic  
52 cell behavior (Moussy et al., 2019, 2017). How this quasi-random gene expression pattern is  
53 generated and how it transforms into a defined gene expression profile remain unknown. In order  
54 to answer these questions, we investigated the nature, the order and the timescale of the early  
55 chromatin and transcriptional changes that follow the induction of differentiation in CD34+ cells.  
56  
57 To do this, we performed single cell RNA sequencing of human cord blood CD34+ cells at  
58 different time points during the 96h period following their stimulation, a period that has been

59 shown to be critical for cell fate decision (Moussy et al., 2017). The gene expression profiles were  
60 correlated to the DNA accessibility changes determined by ATAC-seq at defined time-points  
61 during the same period. The data revealed strikingly different dynamics for chromatin accessibility  
62 and gene expression that challenges the classical model based on specific stepwise switches.  
63

## 64 **Results**

### 65 **Initial transcription burst precedes stable expression profiles.**

66 The experimental strategy is shown in **Figure 1A**. Human CD34<sup>+</sup> cells were isolated from the  
67 cord blood of two healthy donors and cultured in the presence of early acting cytokines as described  
68 previously (Moussy et al., 2017). To identify the transcriptional signatures and to estimate their  
69 variability at the earliest stages of the differentiation process, we performed MARS-seq (massively  
70 parallel single-cell RNA-sequencing, see Materials and Methods) on CD34<sup>+</sup> cells randomly sorted  
71 at different time points (5h, 24h, 48h, 72h and 96h) after the cells were cultured in the presence of  
72 cytokines (Jaitin et al., 2014). The uniform random sampling of a heterogenous population allowed  
73 us to evaluate the global changes without any preconceived ideas on the cell categories present in  
74 the population. The quantification of gene expression was calibrated using unique molecular  
75 identifier (UMI) marked RNAs. Details about quality control of the results are shown in **Table S1**.  
76 In order to avoid potential bias due to batch correction, the results of the two donors were analyzed  
77 separately.

78  
79 The results revealed important features in global gene expression dynamics (**Figure 1**). Following  
80 stimulation, the transcriptome underwent rapid and substantial quantitative and qualitative  
81 changes. Both the number of expressed genes per cell and the number of mRNA molecules per  
82 gene increased substantially (**Figure 1B and 1C**). The average number of genes detected per cell  
83 at 5h was only 512 $\pm$ 243 in Donor1. This number increased to 1693  $\pm$ 813 at 24h and 2543 $\pm$   
84 751 at 48h, but then decreased to 2014 $\pm$ 714 at 72h and to 1612  $\pm$ 613 at 96h. Numbers for  
85 Donor 2 were very similar (see legend **Figure 1B**). The rapid increase in global transcription  
86 activity occurred mainly during the first 48h, suggesting that cells expand their repertoire of  
87 transcribed genes during the initial phase of the differentiation process.

88

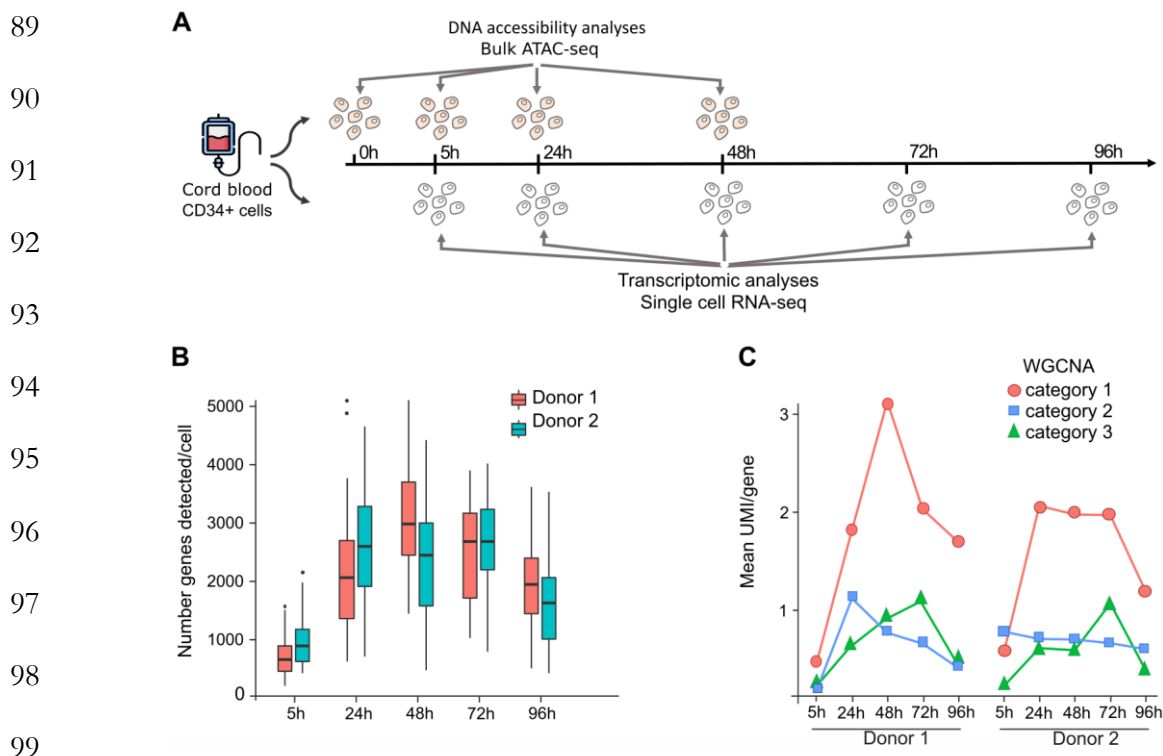

100 **Figure 1. Gene expression dynamics of cord blood derived CD34+ cells.**

101 (A) CD34+ cells were isolated from human cord blood and cultured in serum-free medium with  
 102 early acting cytokines. Single-cell RNA sequencing (scRNA-seq) was used to analyze single-cell  
 103 transcription at 5h, 24h, 48h, 72h and 96h. Concomitantly, at 0h, 5h, 24h and 48h, 5000 living cells  
 104 were collected to perform ATAC-seq protocol in order to study DNA accessibility dynamics. (B)  
 105 Number of detected genes per cell with scRNA-seq. Two donors were analyzed separately, both  
 106 showed similar dynamics. For the Donor 1 see the Results section. For Donor 2, at 5h - 760 genes  
 107 +/- 297, at 24h - 2298 genes +/- 822, at 48h - 2036 genes +/- 809, at 72h - 2217 genes +/- 612  
 108 and at 96h - 1420 genes +/- 630. (C) Weighted correlation network analysis (WGCNA) reveals  
 109 groups of genes with similar dynamic patterns in the average mRNA expression in Donor1 and  
 110 Donor2. Note that group 1 reproduces the dynamic pattern observed for genes showing detectable  
 111 expression in single cell in (B). Category 1 = 5194 genes (Donor1) and 5518 genes (Donor2), group  
 112 2 = 3977 genes (Donor1) and 2602 (Donor2), group 3 = 1089 genes (Donor1) and 609 genes  
 113 (Donor2).

114

115 Examination of individual genes confirmed a corresponding increase in the number of mRNA  
 116 molecules. Categories of genes with highly correlated mean expression patterns over time could be  
 117 defined using Weighted Correlation Network Analysis (WGCNA) (**Figure 1C**), and the three  
 118 largest categories together sum up to more than 10200 genes for Donor 1 and 8700 genes for  
 119 Donor 2. Strikingly, all three categories display a similar time profile with an initial increase followed  
 120 by a subsequent decrease, pointing to a genome-wide phenomenon. Thus, an average CD34+ cell

121 responds to cytokine stimulation with a strong, but transient gene upregulation, both in terms of  
122 gene number and number of transcripts. During the 24h to 48h period after stimulation, the gene  
123 fraction transcribed in each individual cell rose to reach approximately 10-15% of all genes in the  
124 genome (**Figure 1B**). After 72h, this number started to decrease, coinciding with the time when  
125 the first signs of lineage-specific transcriptional changes appear (Moussy et al., 2017).

126  
127 In order to detect emerging gene expression patterns and characterize the lineage progression and  
128 the possible trajectories of the cells during the period under scrutiny, we analyzed our single-cell  
129 RNA dataset using CALISTA (Clustering And Lineage Inference in Single-Cell Transcriptional  
130 Analysis) [10]. CALISTA is likelihood-based method that uses the two-state stochastic model of  
131 gene transcription to describe the cell-to-cell variability of gene expression at single-cell level  
132 (Peccoud and Ycart, 1995). CALISTA can be used to identify cell clusters and cell lineages, calculate  
133 single-cell transcriptional uncertainty and assign to each cell a likelihood value which reflects the  
134 joint probability of its gene expression levels (mRNA counts). Since we were interested in general  
135 tendencies in transcription changes, we analyzed the single-cell mRNA datasets from two donors  
136 independently. In this way, biases related to batch effects and their corrections can be avoided. For  
137 both donors, CALISTA identified five single-cell clusters on the basis of the 200 most variable  
138 genes (**Table S2**). In both donors, clusters #1 and #2 were essentially composed of cells isolated  
139 at 5h and 24h, respectively (**Figure 2B and S1B**). Clusters #3, #4 and #5 were mixed containing  
140 cells collected at 48h, 72h and 96h (**Figure 2B and S1B**). This suggests that individual cells  
141 progress at their own pace. Some cells reached the profile corresponding to clusters #4 or #5 as  
142 early as 48h, while others needed 96h to do so.

143

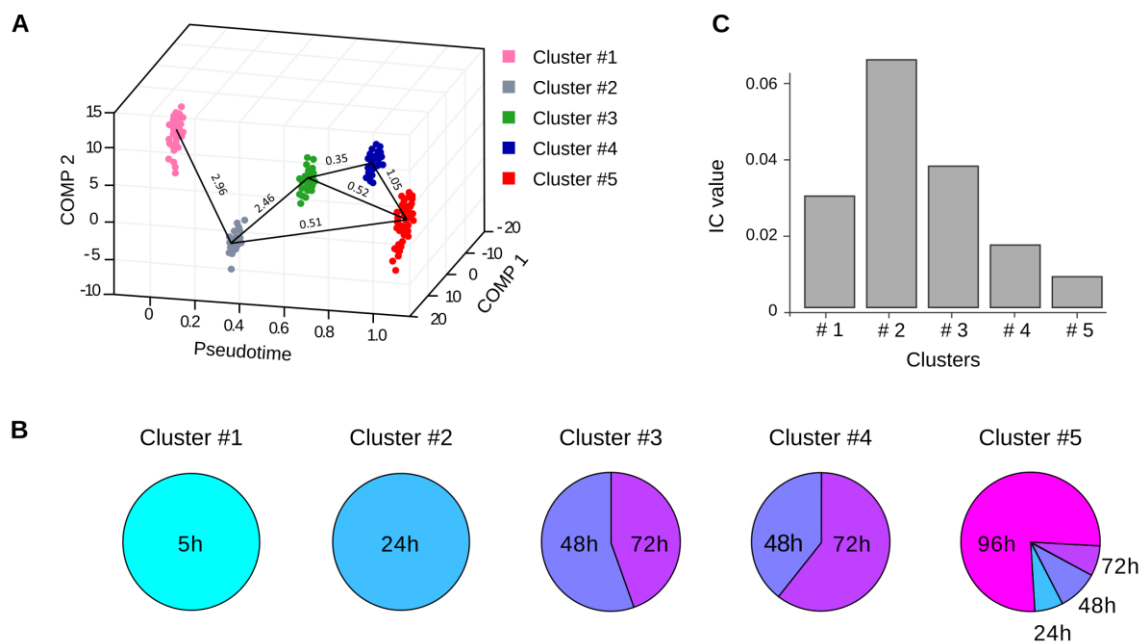

144

145 **Figure 2. Evolution of transcriptome profiles after cell stimulation in Donor 2.**

146 (A) Transcriptome clusters identified by CALISTA for Donor 2. Each dot corresponds to a cell in  
 147 the single-cell transcriptomic dataset sampled at 5h, 24h, 48h, 72h and 96h. The x axis corresponds  
 148 to the pseudotime, the y-z axes to the first and second principal component (PC). The color code  
 149 is given in the upper right inset. The transition edges are represented by black plain lines between  
 150 the clusters and the numbers are “cluster distances”, a likelihood-based measure of dissimilarity  
 151 (distance) between cell clusters. Note that there are several ways a cell can reach the clusters 3 to  
 152 5. The results for Donor 1 are shown on **Figure S1**. (B) Contribution of the cells collected at  
 153 different time points to the clusters identified by CALISTA. The mixed composition of the clusters  
 154 #3 to #5 may reflect the different rates of cell transformation and the multiplicity of cell  
 155 trajectories. (C)  $I_c$  index calculated for each cluster of Donor 2 as described in (Mojtahedi et al.,  
 156 2016). The maximum is reached for cluster #2, indicating a phase of critical transition at 24h. After  
 157 24h, cells from cluster #3, #4 and #5 undergo stabilization, leading to a decreasing  $I_c$  index value.  
 158

159 CALISTA also produces “cluster distances” between each pair of clusters based on the maximum  
 160 difference in the cumulative likelihood values of the gene expression distribution (Papili Gao et al.,  
 161 2020). This index helps to visualize the most likely sequence of the lineage progression (**Figure 2A**  
 162 and **S1A**). Overall, the two graphs show highly similar lineage trajectories. Importantly, the close  
 163 distances between the clusters #3, #4 and #5 makes likely that a cell can reach any of these clusters  
 164 through different pathways or switch between them, as suggested by the reported time-lapse  
 165 observations (Moussy et al., 2017).

166



167 In order to detect early-warning signals that would indicate cell state transitions, we calculated for  
168 each cluster the “index for critical transitions” ( $I_c$ ) as described in (Mojtahedi et al., 2016). To do  
169 this, we calculated the pairwise gene-gene correlation between all pairs of gene vectors ( $R(g_n, g_m)$ )  
170 and the cell-cell correlation between all pairs of cell state vectors ( $R(c_i, c_j)$ ). The analysis was  
171 performed separately for each cluster and each donor. Only the correlations with a Pearson  
172 coefficient higher than 0.70 were taken into account. The  $I_c$  is calculated as the ratio between the  
173 average of all  $R(g_n, g_m)$ -s and  $R(c_i, c_j)$ -s (Mojtahedi et al., 2016). The results shown on **Figure 2C**  
174 **and S1C** indicate that in both donors the  $I_c$  sharply increased towards a maximum between 24h  
175 and 48h and decreased by 72h to 96h (**Figure 2C and S1C**) - a typical hallmark of a critical  
176 transition state.

177  
178 Then, we performed a comparative Gene Ontology analysis of the cell clusters. For this, we used  
179 the list of genes for which the pairwise gene-gene correlation score was greater than 0.70. The top  
180 “molecular function” GO categories ( $p < 0,01$ ) were compared between the clusters (**Figure S2**)  
181 using the “compareCluster” function of the Cluster Profiler package (Yu et al., 2012). The analysis  
182 showed similar enriched GO terms among clusters for donor 1 and donor 2. Cluster #1 is  
183 characterized essentially with broad-spectrum terms associated to translation, transcription  
184 activities and cellular interaction. These categories constitute a common base for all clusters. Cluster  
185 #2 and #3 showed the greatest variety of enriched GO terms, ranging from nucleotide synthesis  
186 to metabolic activities, but with no apparent cell type related functions. Finally, in cluster #5, GO  
187 terms pointing to erythroid lineage related functions emerged (see **Table S3** for GO terms  
188 enrichment statistics), suggesting that these cells are progressing in their lineage commitment.

189  
190 In order to reveal potentially active regulatory interactions that could account for the transcription  
191 dynamics, we explored on a global scale the correlation between changes in the expression of

192 transcription factor-coding genes (TFs) and changes in the expression of their target genes. To do  
193 so, we sorted the genes according to the evolution of their mRNA levels. This classification is based  
194 on the number of UMIs detected in a cell (see STAR Materials and Methods section for details).  
195 Genes that showed a statistically significant change in the corresponding mRNA level in the two  
196 donors are referred to as differentially expressed (DE). Focusing on the early changes, out of the  
197 total number of 14,045 genes that were expressed in at least one time point, we found 5,274 DE  
198 genes between 5h and 24h. Note that such DE genes were mainly upregulated, as only 110 genes  
199 were found downregulated. Genes with unchanged or undetected mRNA level were designated as  
200 “non-DE”. We found 8,771 non-DE genes between 5h and 24h. Among the 470 expressed genes  
201 encoding transcription factors (TFs), 56 showed a significant change in expression between 5h to  
202 24h., labeled as DE-TF genes. Gene targets of the DE-TFs were identified using the Regulatory  
203 Circuits resource (Marbach et al., 2016). We found 4415 potential DE target genes for the 470 TFs.  
204 Finally, among them, the target genes of the 56 DE-TFs are overrepresented (enriched). Indeed,  
205 2,630 of the target DE-genes (60% of 4415) are targeted by at least one of the DE-TFs ( $p=1.4\times 10^{-6}$   
206 )  $p=1.4\times 10^{-6}$ , two-sided Fisher exact test) (**Figure 3A**).

207

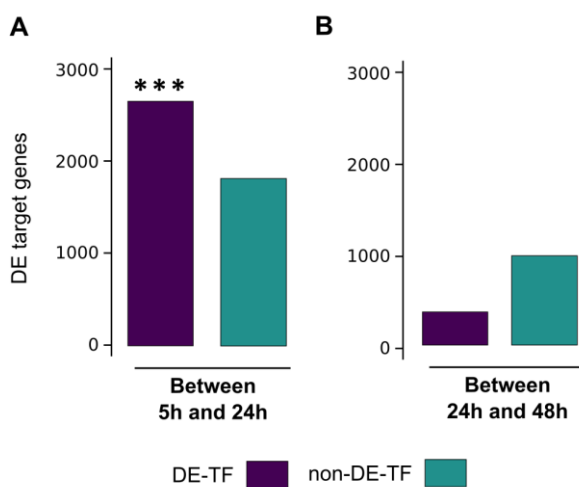

208

209 **Figure 3. Global influence of transcription factors on targeted gene expression.**

210 (A) Total number of differentially expressed target genes (DE target genes) whether their associated  
211 TF is differentially expressed (DE-TF), or non-differentially expressed (non-DE-TF) between 5h

212 and 24h. (B) Total number of differentially expressed target genes (DE target genes) whether their  
213 associated TF is differentially expressed (DE-TF), or non-differentially expressed (non-DE-TF)  
214 between 24h and 48h. Note that the association between differential expression (DE target genes)  
215 and the differentially expressed TF-coding genes targeting them is significant only between 5h and  
216 24h.

217  
218 These observations suggest that the increase of transcription between 5h and 24h could be  
219 potentially facilitated by the activity of TFs targeting them. However, TF activity is not sufficient  
220 to fully explain the expression changes since 40% of the DE target genes increase their transcription  
221 without being targeted by a DE-TF. The same strategy applied to the period between 24h to 48h  
222 revealed a different dynamic compared to the first-time interval (5h to 24h). First, only 16 TFs were  
223 detected as DE and among them, 8 were already classified as such between 5h and 24h. This  
224 decrease is expectedly accompanied with a drastic drop of the number of DE target genes from  
225 4415 (5h-24h) to 1259 (24h-48h).

226

### 227 **Chromatin decompaction is a non-specific response to cell stimulation.**

228 In order to uncover if global chromatin changes occur during the critical state transition period,  
229 we determined the DNA accessibility in the CD34+ cells of three independent donors using  
230 ATAC-seq (Corces et al., 2016) at four time points (0h, 5h, 24h, and 48h after cell stimulation). We  
231 performed bulk ATAC-seq analysis because, contrary to the single-cell version of this technique,  
232 this approach can reliably identify global systemic changes in chromatin structure (Chen et al.,  
233 2019). In order to identify relevant DNA regions, we applied a stringent filter based on the  
234 reproducible detection of accessibility in all three donors (Aranyi et al., 2016) (see **Table S4** for  
235 donor-related information). Performing ATAC-seq on 5000 cells ensured that the detected  
236 accessible DNA regions (peaks) are present in a substantial fraction of cells. Indeed, accessible sites  
237 present in individual, or a small number of cells, could not be differentiated from the technical  
238 noise.

239

240 We found a large number of ATAC-seq peaks in cells at 0h (**Figure 4A**). The number of accessible  
241 DNA regions further increased by 10-12% between 0h and 5h around the transcription start  
242 sites/promoters (TSS), in the introns and exons, but not in the intergenic regions, then decreased  
243 gradually at relatively slow rate over the next 48h (**Figure 4B**). The time-dependent decrease in the  
244 number of ATAC-seq peaks varied with their genomic location (**Figure 4B**). While the number of  
245 peaks in distal intergenic regions was halved between 5h and 48h, the decrease in the other locations  
246 was less significant (**Figure 4B**). In particular, the number of peaks in TSS/promoter regions only  
247 dropped by 15% between 0h and 48h indicating that these promoters became inaccessible. The  
248 significant number of peaks that appear or disappear indicate a rapid global dynamical change of  
249 the chromatin structure.

250

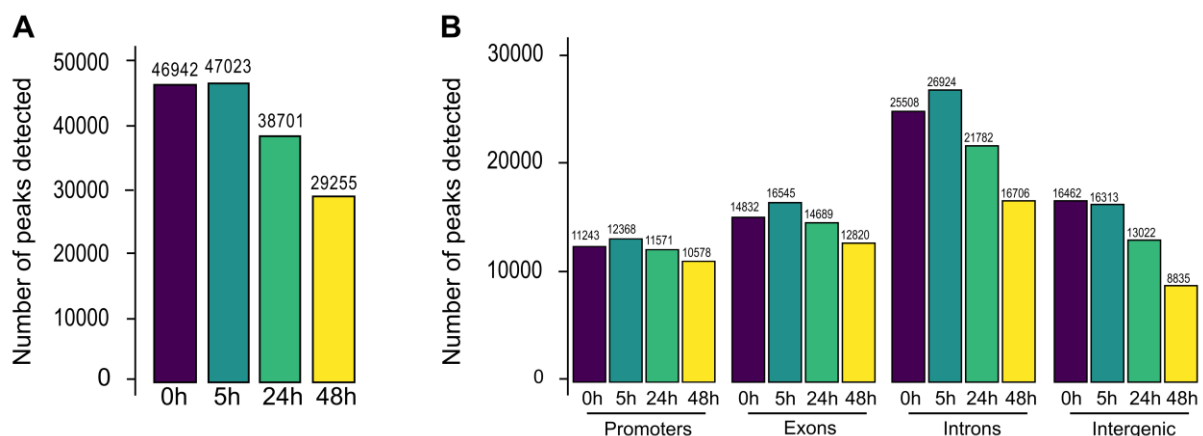

251 **Figure 4. Chromatin dynamics as detected by ATAC-seq.**  
252 (A) Total number of accessible regions (peaks) at 4 different time points. (B) Number of peaks in  
253 different genomic elements. A single peak may count for two categories, except for the intergenic  
254 category defined by the exclusion of all the others.  
255  
256

257 However, the overall tendency emerges from the sum of individual peak dynamics. Therefore, we  
258 have analyzed the changes of individual peaks. First, we estimated the changes in the size of the  
259 peaks that were present at least at two consecutive time points. As a proxy for the size of a peak,  
260 we used the number of sequenced reads that define it. The increase or decrease in read counts for  
261 the same ATAC peak between two consecutive time points was used to assess the tendency of the

262 chromatin to open or close, respectively. We calculated the log-fold changes of the number of  
263 reads of each peak for time intervals and the associated p-values and represented them as volcano  
264 plots (**Figure 5A**). We observed a tendency for the peaks already present at 0h to further increase  
265 in accessibility by 5h, in particular peaks located in the TSS regions (blue dots in **Figure 5A**).  
266 During this period, accessibility was altered at 17% of the total number of elements detected in our  
267 analysis (9,045 out of 53,797). Between 5h and 24h, 15% of the peaks (7,505 out of 50,936)  
268 displayed significant change, with approximately equal proportions of increased and decreased  
269 subsets. However, between 24h and 48h, only 48 out of 40,248 peaks showed differential read  
270 counts, again with roughly equal proportions of increased and decreased peaks (**Figure 5A**).  
271 Overall, our ATAC-seq analysis shows that most of the changes in accessibility occurred during  
272 the first 24 hours (**Figure 5A**). First, new genomic elements become accessible and others already  
273 open become more accessible during the first 5 hours. Then, the trend is reversed: both the number  
274 and size of ATAC-seq peaks decreased between 5h and 24h. The latter trend was maintained, albeit  
275 at a lesser degree, between 24h and 48h. Although this analysis provides a quantitative assessment  
276 of the changes between two time points, it gives no information on the evolution dynamics of  
277 individual peaks. Therefore, we plotted the size of each peak at each time. This representation gives  
278 a precise account of the changes at each peak. On **Figure 5B**, we represented the peaks detected  
279 in promoters and intergenic regions at all four time points. The majority (75%) of the promoter-  
280 associated peaks belong to this category. In the intergenic region, only 27% of the peaks are  
281 detected at all time points. In both cases, the size of the peaks increased rapidly between 5h and  
282 24h and gradually decreased between 24h and 48h (**Figure 5B**). The peaks that displayed more  
283 complex dynamics are represented on **Figure S3**; either they appeared later than 5h or disappeared  
284 completely at some stage. However, in both categories, the general tendency to decrease remained  
285 the same.  
286

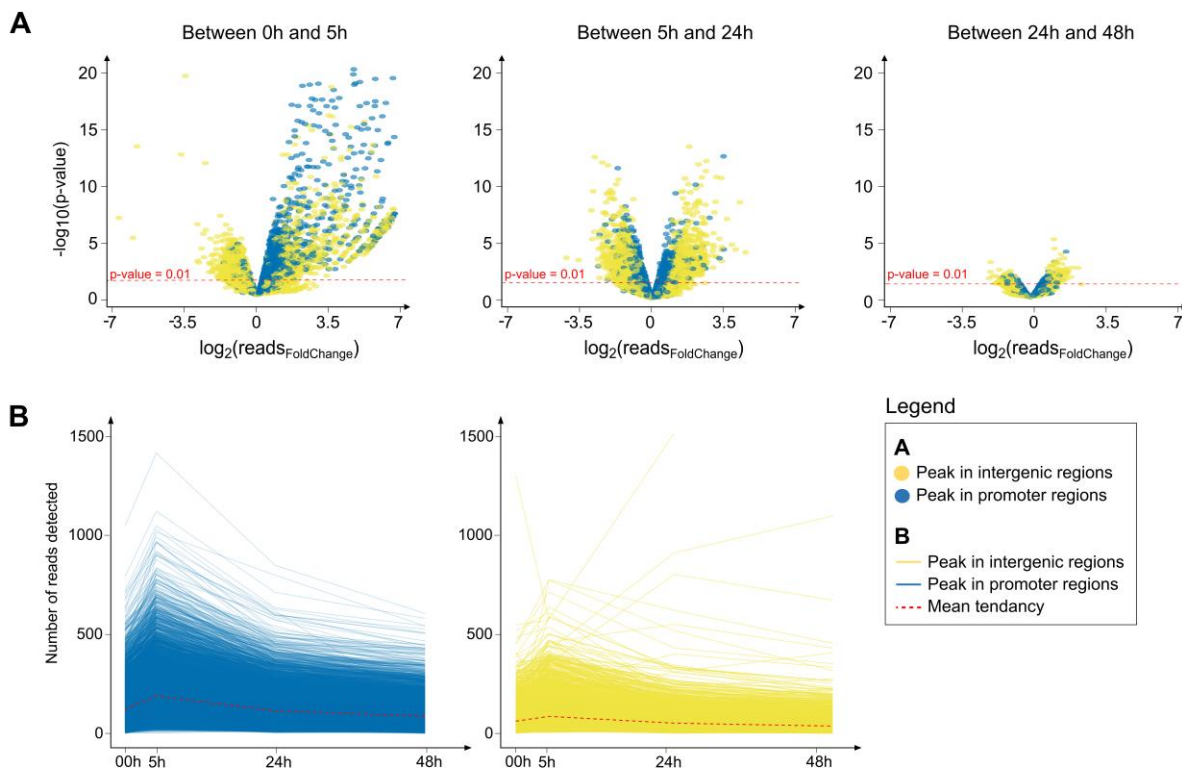

287

288 **Figure 5. Rapid decompaction and slow re-compaction of the chromatin.**

289 (A) Quantitative analysis of the peak sizes detected at two consecutive time points. Peaks in  
 290 promoter regions are highlighted in blue and in intergenic regions in yellow. Note the significant  
 291 increase in size (accessibility) between 0h and 5h and the decreasing number of changes after 24h.  
 292 Details about how the differential accessibility has been calculated are given in STAR Materials and  
 293 Methods. (B) Evolution of the ATAC peaks in promoters (blue, left panel) and intergenic regions  
 294 (yellow, right panel). The size of each ATAC peak is plotted for every time point. Each line  
 295 connects the points corresponding to the ATAC peak detected at the same genomic position. Only  
 296 the peaks detected at each time point are represented.

297

298 To investigate the potential functional importance of the gene promoter accessibility, we analyzed  
 299 the occurrence of various transcription factors binding site (TFBS) motifs in the accessible DNA  
 300 regions. We observed that many of the TFBSs of factors known to play a role in hematopoiesis,  
 301 such as RUNX1, ERG, PU.1 and FLI1, were highly accessible at 0h and remained detectable at a  
 302 similar level up to 48h (**Figure S4**). We also noted that CTCF (CCCTC-binding factor) binding  
 303 sites were detected more than five times more frequently in the accessible regions than expected  
 304 on the basis of their frequency in the genome. Indeed, CTCF is known to play a key role of  
 305 chromatin remodeling and loop formation in general (Ohlsson et al., 2010), but also more  
 306 specifically in the hematopoietic lineage (Kieffer-Kwon et al., 2017).

307

308 **Chromatin decompaction precedes transcriptional burst.**

309 In order to elucidate how the dynamics of chromatin accessibility and the differential gene  
310 expressions were related during the critical state transition, we combined the scRNA-seq and the  
311 ATAC-seq data (see Materials and Methods). Comparison of scRNA-seq and ATAC-seq analysis  
312 in **Figure 1 and 5** shows that the wave of global chromatin opening of gene  
313 promoter/transcription start sites (TSSs) precedes the wave of changes in gene transcription. To  
314 make sense of this, we first examined how changes in the accessibility gene promoter regions are  
315 related to changes in the gene expression. We grouped the promoters in 4 groups: “open-open”,  
316 “open-close”, “close-close” and “close-open”, depending on the presence or absence of ATAC-  
317 seq peaks at the given promoter at 5h and 24h, respectively (**Figure 6A**). The period between 5h  
318 and 24h is particularly interesting and important, because most of the changes in gene expression  
319 occur at this stage. We then identified the genes controlled by each promoter using the Regulatory  
320 Circuit resource (see Materials and Methods). Finally, we examined the distribution of DE and  
321 non-DE genes among the four classes of promoter configuration (i.e. open-open, open-close,  
322 close-open, and close-close). Strikingly, 74,2% of DE genes ( $p < 10^{-4}$ ) had a promoter with “open-  
323 open” configuration between 5h and 24h (**Figure 6A**), meaning that their promoter was already  
324 accessible 5h after cell stimulation, but long before the burst of transcription and they remained so  
325 24h later (**Figure 6A**). This is significantly higher than the proportion of the DE genes in the other  
326 categories of promoter configuration as assessed by enrichment analysis. The same classification  
327 between 24h and 48h revealed similar repartition of DE genes among categories of promoter  
328 configuration (**Figure 6B**). Particularly, more than 60% of DE genes are associated with the  
329 “Open-Open” promoter configuration. However, the total number of DE genes is much lower  
330 during this period ( $n = 1849$ ) compared to the first 24 hours ( $n = 6230$ ) and statistical tests did not  
331 reveal any significant overrepresentation of gene categories (**Figure 6B**).

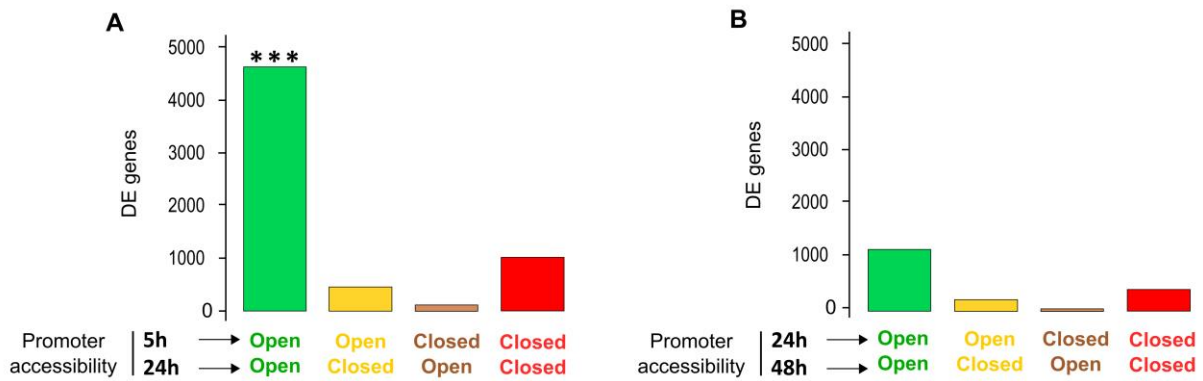

332

333

334 **Figure 6. Promoters of differentially expressed genes are continuously accessible.**

335 (A) Total number of differentially expressed genes (DE genes) as a function of their promoter  
336 accessibility at 5h and 24h. (B) Total number of differentially expressed genes (DE genes) as a  
337 function of their promoter accessibility at 24h and 48h. Note that differential genes expression is  
338 significantly associated to the Open-Open promoter configuration between 5h and 24h.

339

340 We finally examined how alterations of TF expression influenced target gene transcription in  
341 combination with the DNA accessibility of the promoter. To do so, we further categorized the DE  
342 genes assigned to the four groups according to the chromatin configuration of their promoters  
343 “open-open”, “open-close”, “close-close” and “close-open”—depending on whether they were  
344 targeted by DE or non-DE TFs, as determined previously (see Single-cell gene expression analysis  
345 using RNA-seq). Between 5h and 24h, we found a significantly higher proportion of DE genes in  
346 the category DE-TF with “open-open” chromatin configuration than in all other categories (46%;  
347  $p < 2.5 \times 10^{-7}$ ) (**Figure 7A**). In comparison, only 33% of the DE genes were in the non-DE-TF  
348 category with “open-open” chromatin. We performed the similar analysis on the ATAC-seq and  
349 sc-RNA-seq results obtained at 24h and 48h (**Figure 7B**). No significant enrichment was found  
350 for the other categories. The highest fraction of DE genes was found to be associated to the  
351 “Open-Open” promoter configuration category with non-DE-TF (51%) (**Figure 7B**).

352



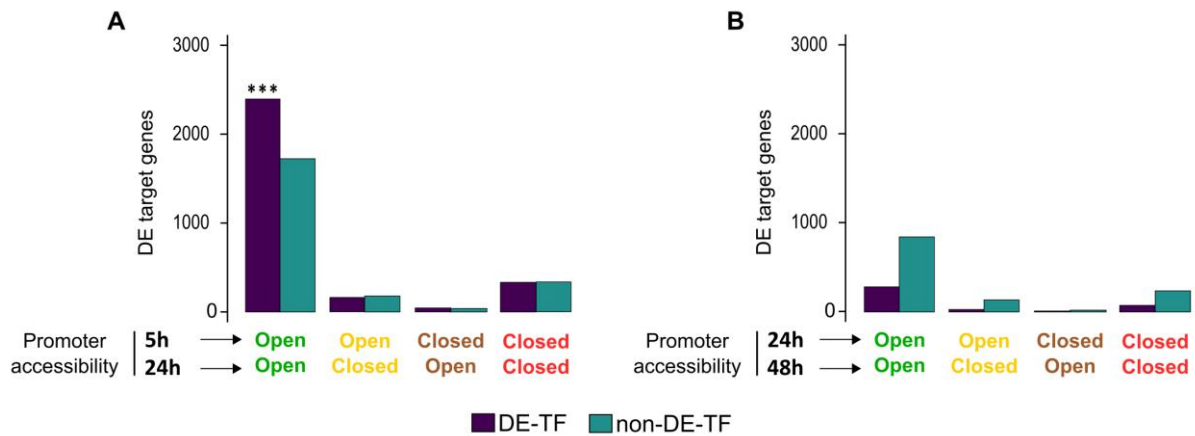

353

354 **Figure 7. Genes targeted by differentially expressed TF-s are expressed differentially if**  
 355 **their promoters are continuously accessible.**

356 (A) Total number of differentially expressed genes (DE genes) targeted by differentially expressed  
 357 (DE-TF) or non-differentially expressed (non-DE-TF) transcription factor-coding genes as a  
 358 function of their promoter accessibility at 5h and 24h. (B) The same as in A for 24h and 48h.  
 359

360 Taken together, the integration of gene expression and chromatin accessibility data shed light on  
 361 the chronology of transcriptional regulation in the CD34+ cells. We observed that genome-wide  
 362 chromatin opening precedes the multilineage-type mixed hyper-expression of a very large number  
 363 of genes. After 48h, both gene hyper-expression and the number of accessible promoters and  
 364 extragenic sites started to decrease concomitantly with the emergence of distinct cell populations  
 365 with particular gene expression patterns.

## 366 **Discussion**

367 *In vitro* cultured human cord blood derived CD34+ cells are usually considered as a heterogenous  
368 population of cells. Recent studies demonstrated that this heterogeneity is not the result of the  
369 mixture of different cell types or subsets, but a population of cells with a wide distribution of gene  
370 expression patterns (Velten et al., 2017) that fluctuate between transitory states, generating  
371 morphological and transcriptional instability (Moussy et al., 2017). During the first cell cycle, each  
372 cell displays a rather distinct gene expression pattern but similar morphology. By 48 to 72 hours,  
373 one can observe the emergence of two different cellular morphologies and two different  
374 characteristic transcription profiles (Moussy et al., 2017). This observation prompted us to  
375 investigate this critical window of time in more details.

376

377 Using ATAC-seq, we demonstrated that concomitantly with the cell stimulation the chromatin  
378 undergoes very rapid global decompaction followed by gradual condensation. The process of  
379 decompaction reached a maximum as early as 5h after the stimulation of the cells and made most  
380 of the gene promoters in the genome accessible. The opposite process of closure is slow and  
381 gradual.

382

383 Importantly, the rise-and-fall in chromatin opening precede and overlap with a rise-and-fall in  
384 transcriptional activity peaking at 24-48h. Indeed, the variety in transcribed genes and the number  
385 of mRNA molecules per gene was the lowest at 5h – the first time point tested for scRNA-seq –  
386 but both increased sharply at 24h, reached a plateau between 48h and 72h and decreased at 96h  
387 (**Figure 1B and 1C**). The 5h-to-48h period corresponds to the multilineage-primed stage of the  
388 CD34+ cells that precedes the emergence of the first signs of characteristic gene expression  
389 patterns accompanying differentiation (Moussy et al., 2017).

390

391 Progress through a transitional cell state marked by the rise-and-fall in transcriptional uncertainty  
392 and a concomitant rise-and-fall of cell-to-cell variability was previously reported as a universal  
393 feature of cells during the initial phases of the fate commitment process (Gao et al., 2020). We  
394 show here using CD34+ cells that the global increase in transcription most likely arises as a  
395 consequence of a widespread and non-specific chromatin opening that makes widely accessible  
396 more than 50% of gene promoters in the genome. Importantly, the number of gene promoters  
397 becoming accessible largely exceeds the number of genes that are actually transcribed in each cell  
398 (**Figure 1B and 4B**), pointing to a strong stochastic component in the establishment of the  
399 multilineage primed expression state. Coherent transcription profiles emerge from this  
400 heterogeneous transitory state concomitantly with the gradual chromatin compaction. A significant  
401 fraction of gene promoters (16%) and intergenic sites (46%) in the genome become inaccessible  
402 again between 5h and 48h (**Figure 4B**). The stabilization of the transcriptome is presumably the  
403 consequence of these chromatin changes. Some promoters gradually become repressed by  
404 chromatin closing, while others are stabilized in an open chromatin configuration. The role of TFs  
405 appears crucial at this stage. Indeed, between 5h and 24h the increase of the transcription of TF-  
406 encoding genes correlated with the similar increase of their target genes with accessible promoters.  
407 Changes of the expression of the TF-encoding genes do not alter the target gene expression if their  
408 promoters are in “closed” chromatin configuration around the TSS (**Figure 7A and 7B**), indicating  
409 that chromatin accessibility plays a permissive or gating role for TF action. Since the number of  
410 the open promoters is higher at the beginning of the process than the number of expressed genes,  
411 a competition for the available TFs among accessible promoters may explain the transcriptional  
412 and phenotypic fluctuations observed during this period (Moussy et al., 2017). These fluctuations  
413 cease when the transcriptome is stabilized (Moussy et al., 2017). The role of TFs may be crucial  
414 during the second phase, because their binding may keep the target genes transcribed and prevent  
415 the closing of the chromatin. The proposed scenario of general non-specific chromatin

416 destabilization followed by a selective repression of the genes is also supported by the observations  
417 showing that the inhibition of chromatin compaction using valproic acid (VPA), a histone  
418 deacetylase inhibitor, can maintain the multilineage-primed state with promiscuous transcription  
419 profile for a long period (Chaurasia et al., 2014; Moussy et al., 2019, 2017). The removal of VPA  
420 allows defined transcriptome profiles to be established (Moussy et al., 2019). Therefore, chromatin  
421 structural changes appear to be causally involved both in the generation of a non-specific  
422 multilineage-primed transcriptional state and the stabilization of the cell fate choice.

423

424 Recent mechanistic studies in various cellular systems support our model. For example, a recent  
425 study of human fetal hematopoietic cells demonstrated that extensive epigenetic, but not  
426 transcriptional priming of HSC/MPPs, occurs prior to lineage commitment (Ranzoni et al., 2020).  
427 In another study, monitoring the alterations in the chromatin structure and the nuclear architecture  
428 during B cell activation revealed that as quiescent lymphocytes encounter antigens, they rapidly  
429 decondense chromatin by spreading nucleosomes from the nuclear matrix to the entire  
430 nucleoplasm, decompacting chromatin clusters into mononucleosome fibers, and strengthening  
431 their nuclear architecture by creating new CTCF loops and contact domains. The global  
432 decompaction and loop formation require Myc, constant energy input, histone acetylation, and is  
433 accompanied by an increase in regulatory DNA interactions and gene expression (Kieffer-Kwon  
434 et al., 2017). Studies on hair bulb stem cells also showed that changes in chromatin accessibility  
435 precede gene expression changes and lineage commitment (Ma et al., 2020). Similarly, the loss of  
436 DNA methylation has been shown to be essential for the establishment of chromatin accessibility  
437 that determines differential transcription factor binding in neural stem and progenitor cells.  
438 Following the differentiation into glial cells, new methylation is acquired to maintain the identity  
439 of glial cells by silencing neuronal genes (Sanosaka et al., 2017). Furthermore, in human cells, most  
440 changes during differentiation arise from dramatic redistributions of repressive H3K9me3 and

441 H3K27me3 marks, which form blocks that significantly expand in differentiated cells (Hawkins et  
442 al., 2010).

443

444 While the rapid and non-specific opening of the chromatin as a general response to stimulation  
445 appears now to be well documented, it is of particular importance for further understanding to  
446 investigate the process of transcriptome stabilization and the feedback mechanisms that must  
447 accompany the emergence of specific gene expression patterns. In this respect, it may be relevant  
448 that a dynamic positive feedback loop between permissive chromatin and translational output has  
449 been previously reported for embryonic stem- and in CD34+ cells (Bulut-Karslioglu et al., 2018).

450 It is noteworthy that many of the genes with the most variable expression that contribute  
451 significantly to the specification of the emerging transcription patterns are ribosomal protein (RP)  
452 coding genes (**Table S2**), thus impacting the process of translation (Guo, 2018). A high degree of  
453 RP expression heterogeneity has already been observed in hematopoietic cells, where a small subset  
454 of RPs can discriminate cell types belonging to different hematopoietic lineages (Guimaraes and  
455 Zavolan, 2016). Therefore, it is possible that, in addition to the TF and promoter interactions, a  
456 feedback action of the translational output may also contribute to the stabilization of the  
457 chromatin. Analogous feedback regulation has been described in ES cells where the translational  
458 output directly promotes a permissive chromatin environment, in part by maintaining the levels of  
459 unstable euchromatin (Bulut-Karslioglu et al., 2018). Clearly, the selective stabilization of the  
460 chromatin is impacted by many more mechanisms, but their respective roles remain to be clarified.

461

462 The observed non-specific chromatin opening and the rise of an equally non-specific gene  
463 expression as a first step, followed by a slow relaxation toward a defined gene expression pattern  
464 and chromatin stabilization, brings a new perspective to our understanding of how cell fate  
465 commitment is initiated. According to the conventional view, a switch-like activation of fate-

466 specifying genes, followed by a cascade of activation of specific downstream targets determines cell  
467 fate. This view is not compatible with the observations reported here. We propose an alternative  
468 model where stochastic and highly variable expression profile of multilineage-primed transitory  
469 stage emerges as a rapid but non-specific response to a substantial change in the cell's environment.  
470 This reaction is analogous to the physiological stress response whose role is to prepare the organism  
471 to meet new and unforeseen circumstances (Braun, 2015). In the case of the cells, we observe a  
472 general and non-specific opening of the chromatin that lifts the transcription repression and  
473 permits targeted interactions between TFs and gene promoters and enhancers. The quasi-random  
474 activation of genes in a cell under stressful conditions generates a potential of a variety of  
475 phenotypic traits in the cell. Some of these traits promote the cell's survival under selective  
476 pressures imposed by the evolving microenvironment, and they are gradually and selectively  
477 stabilized by feedback mechanisms. All these mechanisms are not yet identified, but explicit and  
478 testable hypotheses have been made on their nature (Paldi, 2003; Páldi, 2020).

479  
480 Overall, fate commitment of the CD34+ cells can be viewed as a continuous iterative process of  
481 constrained optimization of the cell phenotype, a kind of “learning process” that is accomplished  
482 by the cell through interactions and cooperation with the surrounding cells and environment. This  
483 way to conceptualize the question of fate commitment has been theorized long ago (Kupiec, 1997,  
484 1996; Paldi, 2012), and now it is supported by an increasing number single-cell experimental studies  
485 (Gao et al., 2020; Hu et al., 1997; Mojtahedi et al., 2016; Moussy et al., 2017; Richard et al., 2016).

486

487 **Acknowledgements**

488 The authors are grateful to Olivier Gandrillon, Camille Fourneaux and François Delhommeau for  
489 helpful discussions and Sunil Laxman, Takuya Imamura and Olivier Gandrillon for the critical  
490 reading of the manuscript. The authors are also grateful to Sophie Foulon for her help in scRNA  
491 sequencing protocol design.

492 This work was supported by EPHE (11REC/BIMO), ANR grant ANR-17CE12-0031-01  
493 «SinCity».

494

495 **Author contribution**

496 AP, AM, RP and JFD designed the study.

497 RP, AM, LR and SC conducted the experiments.

498 AM, RS, RG and NPG performed CALISTA analysis.

499 RP, DS, RS, SC and RG analyzed the ATAC-seq data.

500 RP, AM, LR, SC, RS, RG, NPG, DS, GC, JC, GF and AP analyzed the results and performed  
501 statistical analysis.

502 RP, AM, GF and LR prepared the figures.

503 AP, RP, GF and LR wrote the paper with the help of their colleagues.

504

505 **Declaration of interests**

506 The authors declare no competing interests.

507

508

## 509 **Materials and Methods**

### 510 **Cell culture**

511 Umbilical cord blood from anonymous healthy donors was obtained from Centre Hospitalier Sud  
512 Francilien, Evry, France or from AP-HP, Hôpital Saint-Louis, Unité de Thérapie Cellulaire, CRB-  
513 Banque de Sang de Cordon, Paris, France (Authorization number: AC-2016-2759). Mononuclear  
514 cells were isolated from cord blood fractions by density centrifugation using Ficoll (Biocoll, Merck  
515 Millipore, Burlington, Massachusetts). Human CD34<sup>+</sup> cells were then enriched in the sample by  
516 immunomagnetic beads using an AutoMACSpro (Miltenyi Biotec, Bergisch Gladbach, Germany).  
517 After collection, enriched CD34<sup>+</sup> cells were frozen in a cryopreservation medium containing 90%  
518 of fetal bovine serum (Eurobio, Les Ulis, France) and 10% of dimethylsulfoxide (Sigma, Saint-  
519 Louis, Missouri) and stored in liquid nitrogen.

520

521 After thawing, the CD34<sup>+</sup> cells were cultured in a 96-well plate in a humidified 5% CO<sub>2</sub> incubator  
522 at 37°C. Cells were cultured in prestimulation medium made of X-Vivo (Lonza, Basel, Switzerland)  
523 supplemented with penicillin/streptomycin (respectively 100U/mL and 100ug/mL - Gibco,  
524 Thermofisher Scientific, Waltham, Massachusetts), 50 ng/ml h-FLT3, 25 ng/ml h-SCF, 25 ng/ml  
525 h-TPO, 10 ng/ml h-IL3 (Miltenyi Biotec, Bergisch Gladbach, Germany) final concentration.

526

### 527 **Fast-ATAC-seq**

528 We used Fast ATAC-seq with minor modifications. This protocol was optimized for blood cells  
529 (Corces et al., 2016). Prior to transposition, cells were marked with 7AAD, and dead cells were  
530 removed by FACS (Beckman Coulter, Brea, California). Removing dead cells is an important  
531 parameter to ensure clear nucleosome patterns and to improve signal to noise ratio. 5000 living  
532 cells were used at each time point. A one-step gentle membrane permeabilization and DNA  
533 transposition was performed by adding 50ul transposition mixture (25 uL TD buffer 2X, 2,5uL of



534 transposase TDE1 (Illumina, San Diego, California), 0,5 uL digitonin 0,1% (Promega, Madison,  
535 Wisconsin) and 22 uL water) to the cell pellets and by incubating at 37°C for 30 minutes under  
536 agitation. Obtained Transposed DNA were then purified using MinElute PCR Purification Kit  
537 (Qiagen, Hilden, Germany) and preamplified using Nextera barcoded primers (Illumina, San  
538 Diego, California) and NEBNext High-Fidelity 2xPCR Master Mix (New England Biolabs,  
539 Ipswich, Massachusetts) for 5 cycles. A quantitative PCR amplification was made on 5uL of the  
540 sample with SYBR Green to determine the number of additional cycles in order to generate libraries  
541 with a minimal number of PCR cycles and to limit PCR bias (according (Corces et al., 2016)).  
542 Appropriate number of PCR cycles were applied on the rest of the pre-amplified samples. PCR  
543 fragments were purified with MinElute PCR Purification Kit (Qiagen, Hilden, Germany) to get rid  
544 of unused primers. A supplemental purification step was performed using Ampure beads kit  
545 (Beckman Coulter, Brea, California) to size-select DNA fragments ranging between 100 and 700  
546 pb. ATAC-seq libraries were checked for quality using Bioanalyzer (Agilent, Santa Clara, California)  
547 prior to sequencing and sequenced in paired-end mode (2x50bp) on the Illumina HiSeq2500  
548 platform.

549

#### 550 **Single-cell RNA sequencing adapted from MARS-seq**

551 To perform scRNA-seq, we adapted the MARS-seq protocol (Massively parallel single-cell RNA  
552 sequencing) (Jaitin et al., 2014). CD34+ cells were stained with 7AAD to only work living cells and  
553 cells were isolated by FACS. Individual cells were sorted into 96-well plates containing 4uL of lysis  
554 buffer with specific barcoded RT primers (final concentration: 0,2% Triton, 0,4 U/ $\mu$ L RNaseOUT  
555 (Thermofisher Scientific, Waltham, Massachusetts), 400nM idx\_RT\_primers). Idx\_RT\_primers  
556 contain a T7 RNA polymerase promoter for further *in vitro* transcription (IVT), single cell barcodes  
557 for subsequent de-multiplexing and unique molecular identifiers (UMIs) allowing correction for  
558 amplification biases (**Table S6**). After cell sorting, plates were immediately centrifuged and put into

559 dry ice before storage at  $-80^{\circ}\text{C}$  preceding the reverse transcription (RT). To open RNA secondary  
560 structure, plates containing single cells were incubated at  $72^{\circ}\text{C}$  for 3 minutes and immediately put  
561 in ice.  $4\mu\text{L}$  of RT mix were added in each well (final concentration of RT mix:  $20\text{mM DTT}$ ,  $2\text{mM}$   
562  $\text{dNTP}$ ,  $2\text{X}$  First stranded buffer,  $5\text{ U}/\mu\text{L}$  Superscript III RT enzyme,  $10\%$  (W/V) PEG 8000).  
563 PEG8000 was added in the RT mix because it has been shown that it can increase the cDNA yield  
564 in scRNA sequencing (Bagnoli et al., 2018). ERCC RNA spike-in mix (ThermoFisher Scientific,  
565 Waltham, Massachusetts) was also added to the solution for further amplification quality filtering  
566 (dilution  $1/40.10\text{e}7$ ). The plate was then put into thermocycler (thermocycler program:  $42^{\circ}\text{C}$ -2min,  
567  $50^{\circ}\text{C}$ -50min,  $85^{\circ}\text{C}$ -5min,  $4^{\circ}\text{C}$  hold).

568  
569 After first retro-transcription, samples were pooled (see (Jaitin et al., 2014)) and ExonucleaseI  
570 digestion was performed, followed by  $1,2\text{X}$  AMPure beads purification kit (Beckman Coulter, Brea,  
571 California) to keep only retro-transcribed single strand cDNA. Samples were eluted in  $17\mu\text{L}$  of  
572  $10\text{mM Tris-HCl}$ ,  $\text{pH}=7,5$ . Second strand cDNA synthesis (SSS) using NEBNext mRNA second  
573 strand synthesis module kit was then performed (SSS mix:  $2\mu\text{L}$   $10\text{x}$  SSS buffer,  $1\mu\text{L}$  SSS enzyme;  
574 thermocycler program:  $16^{\circ}\text{C}$ -150min,  $65^{\circ}\text{C}$ -20min,  $4^{\circ}\text{C}$  hold). Obtained cDNA was linearly  
575 amplified by overnight IVT (HighScribe T7 High Yield RNA synthesis, NEB) at  $37^{\circ}\text{C}$  under T7  
576 promoter. The product was purified with  $1,3\text{X}$  Ampure beads and eluted in  $10\mu\text{L}$  of  $10\text{mM Tris-}$   
577  $\text{HCl}$ ,  $0,1\text{mM EDTA}$ .  $9\mu\text{L}$  of amplified RNA were then enzymatically fragmented with  $1\mu\text{L}$  of  $10\text{x}$   
578 RNA fragmentation reagents (ThermoFisher Scientific, Waltham, Massachusetts) in  $70^{\circ}\text{C}$  for 3  
579 min. The fragmentation was stopped with  $34\mu\text{L}$  of STOP mix ( $1,2\mu\text{L}$  Stop solution,  $26,4\mu\text{L}$   
580 AMPure beads,  $9,8\mu\text{L TE}$ ) and samples were purified. Differing from original MARSseq protocol,  
581 the second RT was done with primers (P5N6\_XXXX) containing random hexamers and specific  
582 barcode (**Table S6**) to distinguish the different plates (*ie.* times) (final concentration:  $5\text{mM DTT}$ ,

583 500uM dNTP, 10uM P5N6\_XXXX, 1X First stranded buffer, 10U/ $\mu$ L Superscript III RT  
584 enzyme, 2U/ $\mu$ L RNaseOUT; thermocycler program: 25°C 5min, 55°C 20min, 70°C 15min,  
585 4°C hold). cDNA was purified with 1,2x AMPure beads and eluted in 10 $\mu$ L.

586  
587 As for ATAC-seq , the appropriate number of PCR cycles was determined using a fraction of the  
588 library with SYBR Green based qPCR as described in (Zilionis et al., 2017) (final concentration:  
589 1x Kapa Hifi HotStart PCR mix, 1x SybrGreen, 0,5 $\mu$ M mix primer P5.Rd1/P7.Rd2;  
590 Thermocycler program: 95°C 3min – 40cycles: 98°C 20sec , 57°C 30sec , 72°C 40sec – 72°C  
591 5min, 4°C hold). After PCR amplification, libraries were purified with 0,7x AMPure beads.  
592 Libraries were checked for quality, using Bioanalyzer HighSensitivity DNA (Agilent, Santa Clara,  
593 California) prior to sequencing. Libraries were finally sequenced in paired-end mode  
594 (2x50bp) on Illumina HiSeq2500 platform.

595  
596 Idx RT primers: TTTTTTTTTTTTTTTTTTTTTTN = poly-T allowing matching with mRNA poly-A tail,  
597 NNNN = 4 bases UMI (randomly generated), XXXXXX = 6 bases cell barcode (**Table S6**). The  
598 rest of the sequence consists of a PCR adaptor and a T7 promoter sequence for further IVT  
599 amplification. P5N6 XXX: NNNNNN = random hexamer allowing the capture of the  
600 fragmented IVT amplified RNA, XXXX = 4 bases “plate barcode” (**Table S6**). The rest of  
601 the sequence consists of a PCR adaptor. P5.Rd1/P7.Rd2 : P5 and P7 Illumina sequencing  
602 adaptors.

603

## 604 **Bioinformatic analysis**

### 605 **Single-cell RNA-seq (scRNA-seq)**

#### 606 Raw data processing

607 Cell and plate barcode demultiplexing steps were accomplished under strict selection criteria with  
the following command:

608 `< cutadapt -q 30 -e 0 -m 30:20 --no-trim --no-indels --pair-filter = any >`

609

610 Sequence for both barcodes (cells and time) sequences are given in **Table S6**.

611

612 ERCC mapping was performed using bowtie2 (Langmead and Salzberg, 2012) on ERCC known  
613 sequences and regular mapping was performed using STAR (Dobin et al., 2013) on the reference  
614 genome version hg19 and aligned reads annotated. After quality filtering, reads and UMIs count  
615 per gene and ERCC were calculated for expression analysis.

616

#### 617 Cell and gene filtering

618 Chromosome Y was removed from the analysis to avoid unwanted effects and only protein coding  
619 genes were kept for further analysis. Cells with less than 80 000 total reads were removed, as well  
620 as cells with more than 10% of reads corresponding to mitochondrial RNA. To reduce undesired  
621 effect due to PCR non-linear amplification, ERCC spikes were used to assess the linearity of  
622 amplification. Pearson correlation coefficient was calculated for each cell, and only cells above 0,6  
623 were retained. For each cell remaining, genes were defined as detectable if at least two cells  
624 contained more than a single UMI (=transcript) and a minimum of 5 reads in total.

625

#### 626 Single-cell clustering and variability analysis

627 Clustering analysis was performed with CALISTA (Clustering and Lineage Inference in Single-Cell  
628 Transcriptional Analysis) (Papili Gao et al., 2020), a numerically efficient and highly scalable  
629 toolbox for end-to-end analysis of single-cell transcriptomic profiles. This approach includes  
630 single-cell mRNA counts in a probabilistic distribution function associated with stochastic gene  
631 transcriptional bursts and random technical dropout events. In the data pre-processing, we  
632 removed cells with more than 95% of zero expression values and then selected the top 200 most

633 informative genes for further analysis. The optimal number of clusters was chosen to be five based  
634 on the eigengap plot (see (Papili Gao et al., 2020) for more details).

635

#### 636 WGCNA

637 We applied Weighted Correlation Network Analysis (WGCNA) (Langfelder and Horvath, 2008)  
638 to the mRNA expression data from each donor separately, to identify modules of genes with similar  
639 gene transcriptional dynamics. We excluded genes without any detectable expression in all samples.  
640 In implementing WGCNA, we set the soft-thresholding power for a scale-free topology index of  
641 0,9. For each module, we calculated the mean expression of genes by averaging the UMI counts  
642 from the two donors separately.

643

#### 644 Enrichment Analysis

645 We obtained a curated collection of TFs to CAGE-defined promoters to gene isoform mapping  
646 for a total of 662 human TFs from the Regulatory Circuits resource (Marbach et al., 2016; Noguchi  
647 et al., 2017). In our analysis, we used only TF – Promoter pairs with moderate confidence scores  
648 > 0.5. We grouped genes based on whether the relevant TFs demonstrated differential expressions.  
649 More specifically, a classification of “changes in TF” was given to any gene in which at least one  
650 of its TFs showed a differential expression. Otherwise, a classification of “no change in TF” was  
651 assigned. A two-sided Fisher exact test was used to perform over- and under-representation  
652 analysis (Agresti, 2007).

653

#### 654 **Bulk ATAC-seq**

#### 655 Raw data processing

656 Tn5 adapters sequences were first trimmed with the following command:

657 `< cutadapt -q 20 -g "AGATGTGTATAAGAGACAG; max_error_rate=0.1; min_overlap = 10" -A`  
658 `"AGATGTGTATAAGAGACAG; max_error_rate = 0.1; min_overlap = 10" --minimum-length 18 --`  
659 `times 2 --pair-filter = both >`

660

661 Genome alignment (hg19) was performed using Bowtie2 with the following parameters:

662 `< bowtie2 -x hg19 --no-unal -X 800 >`

663

664 Only Paired-End fragments were kept, considering mapping quality (phred score = 30). Duplicated  
665 reads were removed using Picard MarkDuplicates tool. In attempt to not bias the signal recovered  
666 after peak calling due to multiple donors, all paired-end files were randomly downsampled to 16M  
667 reads (without disrupting pairs of reads) as regard to the smallest number of reads detected in the  
668 cohort (Donor 1 – 0h, see **Table S4**).

669

670 ATAC-seq peaks were then called on those downsampled files using:

671 `< macs2 callpeak -f BAMPE -g hs -B --broad --broad-cutoff 0.1 --keep-dup all >`

672

673 In order to retain only significant accessibility peaks across samples, each list of peaks used in  
674 advanced analysis has been defined as the intersection between peaks of the 3 donors tested at the  
675 same time point.

676

### 677 Peak annotation

678 Peaks were assigned to genomic regions thanks to a home-made script based on the FindOverlap  
679 function from the R package “GenomicRanges” (Lawrence et al., 2013). Genomic elements  
680 positions (exons, introns, CpG islands and CTCF) were retrieved from UCSC database (hg19). As  
681 for the RNA-seq analysis, promoters regions were retrieved from the online database FANTOM5

682 (Noguchi et al., 2017). Intergenic category was defined as the exclusion of all other defined  
683 categories. No priority has been set across the different genomic elements. Therefore, peaks  
684 overlapping several genomic features are counted multiple times, resulting in a total number of  
685 peaks across elements exceeding the total number of peaks detected at each time point.

686

#### 687 Peak differential analysis

688 DEseq2 tool was used to calculate difference in read count between peaks in two consecutive time  
689 points (Love et al., 2014). More precisely, the region considered is defined as the interval formed  
690 by the union of two overlapping peaks at  $t_2$  and  $t_1$ .

691

#### 692 Motif enrichment

693 Peak motif enrichment analysis was conducted with the tool “findMotifsGenome.pl” from the  
694 HOMER software tool suite (Heinz et al., 2010). Background file was generated using an auto-  
695 generated list of random regions across the genome (hg19). Motifs were scanned using the total  
696 length of our peaks by providing the option `<size given>`.

697

#### 698 **ATAC-seq and scRNA-seq combined analysis (accessibility – expression)**

##### 699 Identification of Promoters that have configurational changes

700 In an effort to identify promoter regions that are affected (and not affected) by configurational  
701 changes of the chromatin, we employed the R Bioconductor package “GenomicRanges”  
702 (Lawrence et al., 2013). By comparing the peaks overlapping the promoters between two time  
703 points (0h – 5h, 5h – 24 h and 24h – 48h), we grouped promoters into 4 possible chromatin  
704 accessibility configurations: “open-open”, “open-close”, “close-open”, and “close-close”. We then  
705 used the CAGE-defined promoters to gene isoform mapping from the Regulatory Circuits

706 resource (Marbach et al., 2016; Noguchi et al., 2017) to identify promoters that overlap with the  
707 peaks of ATAC-seq and their corresponding target genes.

708

### 709 Differential gene expression of single-cell RNA sequencing

710 We computed Z-scores for every gene in each of the two donors between two different time points  
711 using the mean and standard deviation of the UMI counts of approximately 100 single cells.

712

$$713 \quad Z_{ij}^{t_2-t_1} = \frac{\text{mean}(UMI_j^{t_2}) - \text{mean}(UMI_j^{t_1})}{\frac{\left( \left( \text{sd}(UMI_j^{t_2}) \right)^2 + \left( \text{sd}(UMI_j^{t_1}) \right)^2 \right)^{1/2}}{10}}$$

714

715  $Z_{ij}^{t_2-t_1}$  denotes the Z-score of the expression change of gene  $j$  in donor  $i$  between time  $t_2$  and  $t_1$ .

716 An average Z-score between the two donors was computed and used to identify the set of  
717 differentially expressed genes. We selected Z-score thresholds of 2 and -2 (i.e., two standard  
718 deviations of change) to designate upregulated and downregulated genes, respectively. Collectively,  
719 they represent the set of differentially expressed genes (DE genes).

720

### 721 Enrichment Analysis of Combined ATAC-seq and scRNA-seq

722 For the combined ATAC- and scRNA-seq analysis, we grouped genes into 8 possible groups based  
723 on the chromatin accessibility configurations (i.e., one of the following four configurations: “open-  
724 open”, “open-close”, “close-open”, and “close-close”) and whether at least one of their TFs coding  
725 genes showed differential expression (i.e., one of the following two groups: “DE-TF” and “non-  
726 DE-TF”) (**Figure 5C**). As with the analysis of scRNA-seq data, a gene was assigned to the group  
727 “DE -TF” when at least one of its TFs showed differential expression; otherwise, the gene was  
728 classified as “non-DE-TF”. Note that different isoforms of the same gene can have distinct TSSs



729 that are under the control of different promoters. Thus, a gene might be counted in more than one  
730 category in the chromatin accessibility configurations. Consequently, the total sum of the genes in  
731 the 8 groups as described above might exceed the total number of genes. A two-sided Fisher exact  
732 test was used to perform over- and under-representation analysis (Agresti, 2007).  
733

734 **Reference**

- 735 Agresti, A., 2007. An Introduction to Categorical Data Analysis Second Edition.
- 736 Aranyi, T., Stockholm, D., Yao, R., Poinsignon, C., Wiart, T., Corre, G., Touleimat, N., Tost, J.,  
737 Galy, A., Paldi, A., 2016. Systemic epigenetic response to recombinant lentiviral vectors  
738 independent of proviral integration. *Epigenetics and Chromatin* 9, 1–10.  
739 <https://doi.org/10.1186/s13072-016-0077-1>
- 740 Bagnoli, J.W., Ziegenhain, C., Janjic, A., Wange, L.E., Vieth, B., Parekh, S., Geuder, J., Hellmann,  
741 I., Enard, W., 2018. Sensitive and powerful single-cell RNA sequencing using mcSCR-seq.  
742 *Nat. Commun.* 9. <https://doi.org/10.1038/s41467-018-05347-6>
- 743 Braun, E., 2015. The unforeseen challenge: From genotype-to-phenotype in cell populations.  
744 *Reports Prog. Phys.* 78, 036602. <https://doi.org/10.1088/0034-4885/78/3/036602>
- 745 Bulut-Karslioglu, A., Macrae, T.A., Oses-Prieto, J.A., Covarrubias, S., Percharde, M., Ku, G., Diaz,  
746 A., McManus, M.T., Burlingame, A.L., Ramalho-Santos, M., 2018. The Transcriptionally  
747 Permissive Chromatin State of Embryonic Stem Cells Is Acutely Tuned to Translational  
748 Output. *Cell Stem Cell* 22, 369-383.e8. <https://doi.org/10.1016/j.stem.2018.02.004>
- 749 Chaurasia, P., Gajzer, D.C., Schaniel, C., D'Souza, S., Hoffman, R., 2014. Epigenetic  
750 reprogramming induces the expansion of cord blood stem cells. *J. Clin. Invest.* 124, 2378–  
751 2395. <https://doi.org/10.1172/JCI70313>
- 752 Chen, H., Lareau, C., Andreani, T., Vinyard, M.E., Garcia, S.P., Clement, K., Andrade-Navarro,  
753 M.A., Buenrostro, J.D., Pinello, L., 2019. Assessment of computational methods for the  
754 analysis of single-cell ATAC-seq data. *Genome Biol.* 20, 1–25.  
755 <https://doi.org/10.1186/s13059-019-1854-5>
- 756 Corces, M.R., Buenrostro, J.D., Wu, B., Greenside, P.G., Chan, S.M., Koenig, J.L., Snyder, M.P.,  
757 Pritchard, J.K., Kundaje, A., Greenleaf, W.J., Majeti, R., Chang, H.Y., 2016. Lineage-specific  
758 and single-cell chromatin accessibility charts human hematopoiesis and leukemia evolution.

- 759 Nat. Genet. 48, 1193–1203. <https://doi.org/10.1038/ng.3646>
- 760 Dobin, A., Davis, C.A., Schlesinger, F., Drenkow, J., Zaleski, C., Jha, S., Batut, P., Chaisson, M.,  
761 Gingeras, T.R., 2013. STAR: ultrafast universal RNA-seq aligner. *Bioinformatics* 29, 15.  
762 <https://doi.org/10.1093/BIOINFORMATICS/BTS635>
- 763 Gao, N.P., Gandrillon, O., Paldi, A., Herbach, U., Gunawan, R., 2020. Universality of cell  
764 differentiation trajectories revealed by a reconstruction of transcriptional uncertainty  
765 landscapes from single-cell transcriptomic data. *bioRxiv* 2020.04.23.056069.  
766 <https://doi.org/10.1101/2020.04.23.056069>
- 767 Guimaraes, J.C., Zavolan, M., 2016. Patterns of ribosomal protein expression specify normal and  
768 malignant human cells. *Genome Biol.* 17, 236. <https://doi.org/10.1186/s13059-016-1104-z>
- 769 Guo, H., 2018. Specialized ribosomes and the control of translation. *Biochem. Soc. Trans.*  
770 <https://doi.org/10.1042/BST20160426>
- 771 Hawkins, R.D., Hon, G.C., Lee, L.K., Ngo, Q., Lister, R., Pelizzola, M., Edsall, L.E., Kuan, S., Luu,  
772 Y., Klugman, S., Antosiewicz-Bourget, J., Ye, Z., Espinoza, C., Agarwahl, S., Shen, L., Ruotti,  
773 V., Wang, W., Stewart, R., Thomson, J.A., Ecker, J.R., Ren, B., 2010. Distinct epigenomic  
774 landscapes of pluripotent and lineage-committed human cells. *Cell Stem Cell* 6, 479–491.  
775 <https://doi.org/10.1016/j.stem.2010.03.018>
- 776 Heinz, S., Benner, C., Spann, N., Bertolino, E., Lin, Y.C., Laslo, P., Cheng, J.X., Murre, C., Singh,  
777 H., Glass, C.K., 2010. Simple Combinations of Lineage-Determining Transcription Factors  
778 Prime cis-Regulatory Elements Required for Macrophage and B Cell Identities. *Mol. Cell* 38,  
779 576–589. <https://doi.org/10.1016/j.molcel.2010.05.004>
- 780 Hu, M., Krause, D., Greaves, M., Sharkis, S., Dexter, M., Heyworth, C., Enver, T., 1997.  
781 Multilineage gene expression precedes commitment in the hemopoietic system. *Genes Dev.*  
782 11, 774–785. <https://doi.org/10.1101/gad.11.6.774>
- 783 Jaitin, D.A., Kenigsberg, E., Keren-Shaul, H., Elefant, N., Paul, F., Zaretsky, I., Mildner, A., Cohen,

- 784 N., Jung, S., Tanay, A., Amit, I., 2014. Massively parallel single-cell RNA-seq for marker-free  
785 decomposition of tissues into cell types. *Science* (80-. ). 343, 776–779.  
786 <https://doi.org/10.1126/science.1247651>
- 787 Kawamoto, H., Katsura, Y., 2009. A new paradigm for hematopoietic cell lineages: revision of the  
788 classical concept of the myeloid-lymphoid dichotomy. *Trends Immunol.*  
789 <https://doi.org/10.1016/j.it.2009.03.001>
- 790 Kieffer-Kwon, K.R., Nimura, K., Rao, S.S.P., Xu, J., Jung, S., Pekowska, A., Dose, M., Stevens, E.,  
791 Mathe, E., Dong, P., Huang, S.C., Ricci, M.A., Baranello, L., Zheng, Y., Ardori, F.T., Resch,  
792 W., Stavreva, D., Nelson, S., McAndrew, M., Casellas, A., Finn, E., Gregory, C., St. Hilaire,  
793 B.G., Johnson, S.M., Dubois, W., Cosma, M.P., Batchelor, E., Levens, D., Phair, R.D., Misteli,  
794 T., Tessarollo, L., Hager, G., Lakadamyali, M., Liu, Z., Floer, M., Shroff, H., Aiden, E.L.,  
795 Casellas, R., 2017. Myc Regulates Chromatin Decompaction and Nuclear Architecture during  
796 B Cell Activation. *Mol. Cell* 67, 566-578.e10. <https://doi.org/10.1016/j.molcel.2017.07.013>
- 797 Kupiec, J.J., 1997. A Darwinian theory for the origin of cellular differentiation. *Mol. Gen. Genet.*  
798 255, 201–208. <https://doi.org/10.1007/s004380050490>
- 799 Kupiec, J.J., 1996. A chance-selection model for cell differentiation. *Cell Death Differ.* 3, 385–390.
- 800 Langfelder, P., Horvath, S., 2008. WGCNA: An R package for weighted correlation network  
801 analysis. *BMC Bioinformatics* 9, 559. <https://doi.org/10.1186/1471-2105-9-559>
- 802 Langmead, B., Salzberg, S.L., 2012. Fast gapped-read alignment with Bowtie 2. *Nat. Methods* 9,  
803 357–359. <https://doi.org/10.1038/nmeth.1923>
- 804 Lawrence, M., Huber, W., Pagès, H., Aboyoun, P., Carlson, M., Gentleman, R., Morgan, M.T.,  
805 Carey, V.J., 2013. Software for Computing and Annotating Genomic Ranges. *PLoS Comput.*  
806 *Biol.* 9, e1003118. <https://doi.org/10.1371/journal.pcbi.1003118>
- 807 Love, M.I., Huber, W., Anders, S., 2014. Moderated estimation of fold change and dispersion for  
808 RNA-seq data with DESeq2. *Genome Biol.* 15, 550. [36](https://doi.org/10.1186/s13059-014-</a></p></div><div data-bbox=)

809 0550-8

810 Ma, S., Zhang, B., Lafave, L., Chiang, Z., Hu, Y., Ding, J., Brack, A., Kartha, V.K., Law, T., Lareau,  
811 C., Hsu, Y.-C., Regev, A., Buenrostro, J.D., 2020. Chromatin potential identified by shared  
812 single cell profiling of RNA and chromatin. *bioRxiv* 2020.06.17.156943.  
813 <https://doi.org/10.1101/2020.06.17.156943>

814 Marbach, D., Lamparter, D., Quon, G., Kellis, M., Kutalik, Z., Bergmann, S., 2016. Tissue-specific  
815 regulatory circuits reveal variable modular perturbations across complex diseases. *Nat.*  
816 *Methods* 13, 366–370. <https://doi.org/10.1038/nmeth.3799>

817 Mojtahedi, M., Skupin, A., Zhou, J., Castaño, I.G., Leong-Quong, R.Y.Y., Chang, H., Trachana,  
818 K., Giuliani, A., Huang, S., 2016. Cell Fate Decision as High-Dimensional Critical State  
819 Transition. *PLOS Biol.* 14, e2000640. <https://doi.org/10.1371/journal.pbio.2000640>

820 Moussy, A., Cosette, J., Parmentier, R., da Silva, C., Corre, G., Richard, A., Gandrillon, O.,  
821 Stockholm, D., Páldi, A., 2017. Integrated time-lapse and single-cell transcription studies  
822 highlight the variable and dynamic nature of human hematopoietic cell fate commitment.  
823 *PLoS Biol.* 15. <https://doi.org/10.1371/journal.pbio.2001867>

824 Moussy, A., Papili Gao, N., Corre, G., Poletti, V., Majdoul, S., Fenard, D., Gunawan, R.,  
825 Stockholm, D., Páldi, A., 2019. Constraints on Human CD34+ Cell Fate due to Lentiviral  
826 Vectors Can Be Relieved by Valproic Acid. *Hum. Gene Ther.* 30, 1023–1034.  
827 <https://doi.org/10.1089/hum.2019.009>

828 Nimmo, R.A., May, G.E., Enver, T., 2015. Primed and ready: Understanding lineage commitment  
829 through single cell analysis. *Trends Cell Biol.* <https://doi.org/10.1016/j.tcb.2015.04.004>

830 Noguchi, S., Arakawa, T., Fukuda, S., Furuno, M., Hasegawa, A., Hori, F., Ishikawa-Kato, S., Kaida,  
831 K., Kaiho, A., Kanamori-Katayama, M., Kawashima, T., Kojima, M., Kubosaki, A., Manabe,  
832 R., Murata, M., Nagao-Sato, S., Nakazato, K., Ninomiya, N., Nishiyori-Sueki, H., Noma, S.,  
833 Saijyo, E., Saka, A., Sakai, M., Simon, C., Suzuki, N., Tagami, M., Watanabe, S., Yoshida, S.,

834 Arner, P., Axton, R.A., Babina, M., Baillie, J.K., Barnett, T.C., Beckhouse, A.G., Blumenthal,  
835 A., Bodega, B., Bonetti, A., Briggs, J., Brombacher, F., Carlisle, A.J., Clevers, H.C., Davis,  
836 C.A., Detmar, M., Dohi, T., Edge, A.S.B., Edinger, M., Ehrlund, A., Ekwall, K., Endoh, M.,  
837 Enomoto, H., Eslami, A., Fagiolini, M., Fairbairn, L., Farach-Carson, M.C., Faulkner, G.J.,  
838 Ferrai, C., Fisher, M.E., Forrester, L.M., Fujita, R., Furusawa, J., Geijtenbeek, T.B., Gingeras,  
839 T., Goldowitz, D., Guhl, S., Guler, R., Gustincich, S., Ha, T.J., Hamaguchi, M., Hara, M.,  
840 Hasegawa, Y., Herlyn, M., Heutink, P., Hitchens, K.J., Hume, D.A., Ikawa, T., Ishizu, Y., Kai,  
841 C., Kawamoto, H., Kawamura, Y.I., Kempfle, J.S., Kenna, T.J., Kere, J., Khachigian, L.M.,  
842 Kitamura, T., Klein, S., Klinken, S.P., Knox, A.J., Kojima, S., Koseki, H., Koyasu, S., Lee, W.,  
843 Lennartsson, A., Mackay-sim, A., Mejhert, N., Mizuno, Y., Morikawa, H., Morimoto, M.,  
844 Moro, K., Morris, K.J., Motohashi, H., Mummery, C.L., Nakachi, Y., Nakahara, F., Nakamura,  
845 T., Nakamura, Y., Nozaki, T., Ogishima, S., Ohkura, N., Ohno, H., Ohshima, M., Okada-  
846 Hatakeyama, M., Okazaki, Y., Orlando, V., Ovchinnikov, D.A., Passier, R., Patrikakis, M.,  
847 Pombo, A., Pradhan-Bhatt, S., Qin, X.-Y., Rehli, M., Rizzu, P., Roy, S., Sajantila, A.,  
848 Sakaguchi, S., Sato, H., Satoh, H., Savvi, S., Saxena, A., Schmidl, C., Schneider, C., Schulze-  
849 Tanzil, G.G., Schwegmann, A., Sheng, G., Shin, J.W., Sugiyama, D., Sugiyama, T., Summers,  
850 K.M., Takahashi, N., Takai, J., Tanaka, H., Tatsukawa, H., Tomoiu, A., Toyoda, H., van de  
851 Wetering, M., van den Berg, L.M., Verardo, R., Vijayan, D., Wells, C.A., Winteringham, L.N.,  
852 Wolvetang, E., Yamaguchi, Y., Yamamoto, M., Yanagi-Mizuochi, C., Yoneda, M., Yonekura,  
853 Y., Zhang, P.G., Zucchelli, S., Abugessaisa, I., Arner, E., Harshbarger, J., Kondo, A.,  
854 Lassmann, T., Lizio, M., Sahin, S., Sengstag, T., Severin, J., Shimoji, H., Suzuki, M., Suzuki,  
855 H., Kawai, J., Kondo, N., Itoh, M., Daub, C.O., Kasukawa, T., Kawaji, H., Carninci, P.,  
856 Forrest, A.R.R., Hayashizaki, Y., 2017. FANTOM5 CAGE profiles of human and mouse  
857 samples. *Sci. Data* 2017 41 4, 1–10. <https://doi.org/10.1038/sdata.2017.112>  
858 Ohlsson, R., Bartkuhn, M., Renkawitz, R., 2010. CTCF shapes chromatin by multiple mechanisms:

- 859 The impact of 20 years of CTCF research on understanding the workings of chromatin.  
860 Chromosoma. <https://doi.org/10.1007/s00412-010-0262-0>
- 861 Paldi, A., 2012. What makes the cell differentiate? Prog. Biophys. Mol. Biol. 110, 41–43.  
862 <https://doi.org/10.1016/j.pbiomolbio.2012.04.003>
- 863 Paldi, A., 2003. Stochastic gene expression during cell differentiation: Order from disorder? Cell.  
864 Mol. Life Sci. <https://doi.org/10.1007/s00018-003-23147-z>
- 865 Páldi, A., 2020. Random walk across the epigenetic landscape, in: Phenotypic Switching. Elsevier,  
866 pp. 53–76. <https://doi.org/10.1016/b978-0-12-817996-3.00008-6>
- 867 Papili Gao, N., Hartmann, T., Fang, T., Gunawan, R., 2020. CALISTA: Clustering and LINEAGE  
868 Inference in Single-Cell Transcriptional Analysis. Front. Bioeng. Biotechnol.  
869 <https://doi.org/10.3389/fbioe.2020.00018>
- 870 Peccoud, J., Ycart, B., 1995. Markovian modeling of gene-product synthesis. Theor. Popul. Biol.  
871 48, 222–234. <https://doi.org/10.1006/tpbi.1995.1027>
- 872 Pina, C., Fugazza, C., Tipping, A.J., Brown, J., Soneji, S., Teles, J., Peterson, C., Enver, T., 2012.  
873 Inferring rules of lineage commitment in haematopoiesis. Nat. Cell Biol. 14, 287–294.  
874 <https://doi.org/10.1038/ncb2442>
- 875 Ranzoni, A.M., Tangherloni, A., Berest, I., Riva, S.G., Myers, B., Strzelecka, P.M., Xu, J., Panada,  
876 E., Mohorianu, I., Zaug, J.B., Cvejic, A., 2020. Integrative Single-cell RNA-Seq and ATAC-  
877 Seq Analysis of Human Foetal Liver and Bone Marrow Haematopoiesis. bioRxiv  
878 2020.05.06.080259. <https://doi.org/10.1101/2020.05.06.080259>
- 879 Richard, A., Boullu, L., Herbach, U., Bonnafoux, A., Morin, V., Vallin, E., Guillemin, A., Papili  
880 Gao, N., Gunawan, R., Cosette, J., Arnaud, O., Kupiec, J.J., Espinasse, T., Gonin-Giraud, S.,  
881 Gandrillon, O., 2016. Single-Cell-Based Analysis Highlights a Surge in Cell-to-Cell Molecular  
882 Variability Preceding Irreversible Commitment in a Differentiation Process. PLoS Biol. 14,  
883 e1002585. <https://doi.org/10.1371/journal.pbio.1002585>

- 884 Sanosaka, T., Imamura, T., Hamazaki, N., Chai, M.C., Igarashi, K., Ideta-Otsuka, M., Miura, F.,  
885 Ito, T., Fujii, N., Ikeo, K., Nakashima, K., 2017. DNA Methylome Analysis Identifies  
886 Transcription Factor-Based Epigenomic Signatures of Multilineage Competence in Neural  
887 Stem/Progenitor Cells. *Cell Rep.* 20, 2992–3003.  
888 <https://doi.org/10.1016/j.celrep.2017.08.086>
- 889 Sive, J.I., Göttgens, B., 2014. Transcriptional network control of normal and leukaemic  
890 haematopoiesis. *Exp. Cell Res.* <https://doi.org/10.1016/j.yexcr.2014.06.021>
- 891 Velten, L., Haas, S.F., Raffel, S., Blaszkiewicz, S., Islam, S., Hennig, B.P., Hirche, C., Lutz, C., Buss,  
892 E.C., Nowak, D., Boch, T., Hofmann, W.K., Ho, A.D., Huber, W., Trumpp, A., Essers,  
893 M.A.G., Steinmetz, L.M., 2017. Human haematopoietic stem cell lineage commitment is a  
894 continuous process. *Nat. Cell Biol.* 19, 271–281. <https://doi.org/10.1038/ncb3493>
- 895 Yu, G., Wang, L.G., Han, Y., He, Q.Y., 2012. ClusterProfiler: An R package for comparing  
896 biological themes among gene clusters. *Omi. A J. Integr. Biol.* 16, 284–287.  
897 <https://doi.org/10.1089/omi.2011.0118>
- 898 Zilionis, R., Nainys, J., Veres, A., Savova, V., Zemmour, D., Klein, A.M., Mazutis, L., 2017. Single-  
899 cell barcoding and sequencing using droplet microfluidics. *Nat. Protoc.* 12, 44–73.  
900 <https://doi.org/10.1038/nprot.2016.154>
- 901
- 902



903 **Supplemental information**

904

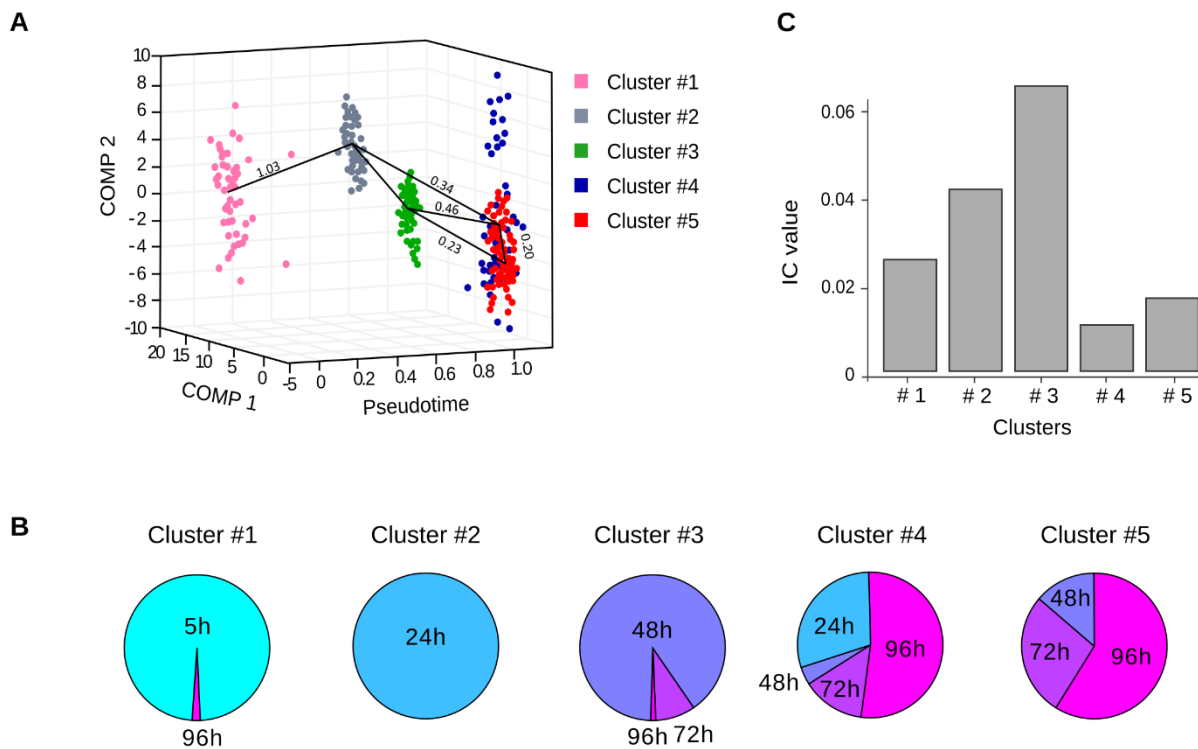

905

906 **Figure S1. Evolution of transcriptome profiles after cell stimulation in Donor 1.**

907 (A) Transcriptome clusters identified by CALISTA for donor 1. Each dot corresponds to a cell in  
 908 the single-cell transcriptomic dataset sampled at 5h, 24h, 48h, 72h and 96h. The x axis corresponds  
 909 to the pseudotime, the y-z axes to the first and second principal component (PC). The color code  
 910 is given in the upper right inset. The transition edges are represented by black plain lines between  
 911 the clusters and the numbers are “cluster distances”, a likelihood-based measure of dissimilarity  
 912 (distance) between cell clusters. Note that there are several ways a cell can reach the clusters 3 to  
 913 5. The results for Donor 2 are shown on **Figure 2**. (B) Contribution of the cells collected at  
 914 different time points to the clusters identified by CALISTA. The mixed composition of the clusters  
 915 #3 to #5 may reflect the different rates of cell transformation and the multiplicity of cell  
 916 trajectories. (C) Ic index calculated for each cluster of donor 1 as described in (Mojtahedi et al.,  
 917 2016). The maximum is reached for cluster #3, indicating a phase of critical transition at 48h. As  
 918 soon as 24h, but mainly after 48h, cells from cluster #4 and #5 undergo stabilization, leading to a  
 919 decreasing Ic index value.

920

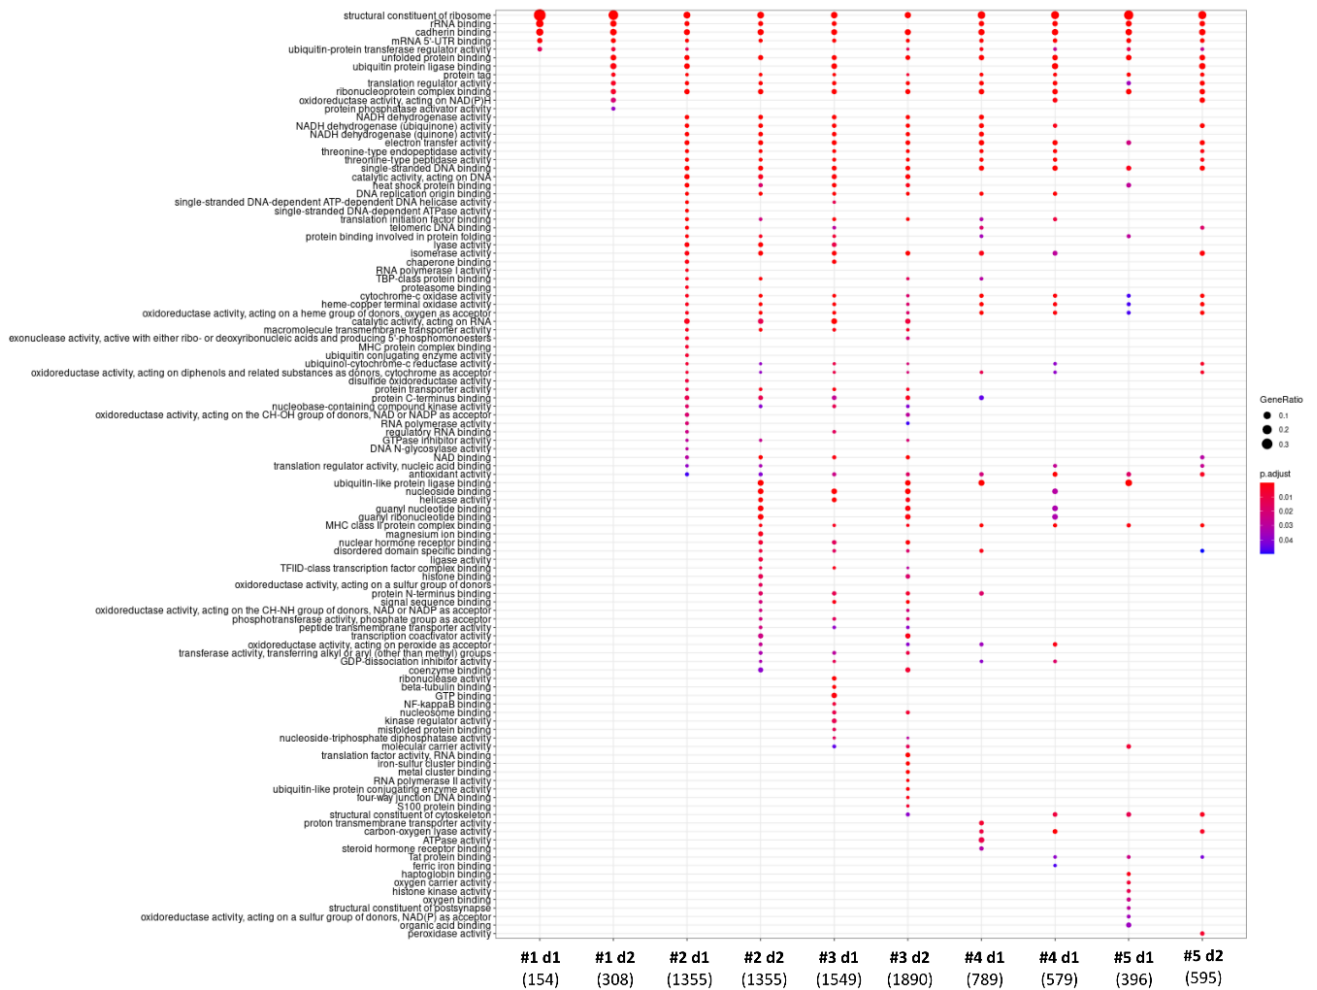

921

922 **Figure S2. Comparative GO enrichment analysis of clusters in both donors.**

923 Top gene ontology categories (GO) found in the clusters of cells determined with CALISTA (p-  
 924 adj < 0.05). Genes with pairwise gene-gene correlation scores greater than 0.70 were used for the  
 925 GO analysis. Columns correspond to individual clusters (#) from donor 1 (d1) and 2 (d2).  
 926 Numbers of genes associated to each cluster are indicated between parentheses under each cluster,  
 927 on the x-axis. For GO terms associated statistics and entrez gene IDs, see **Table S3**.  
 928

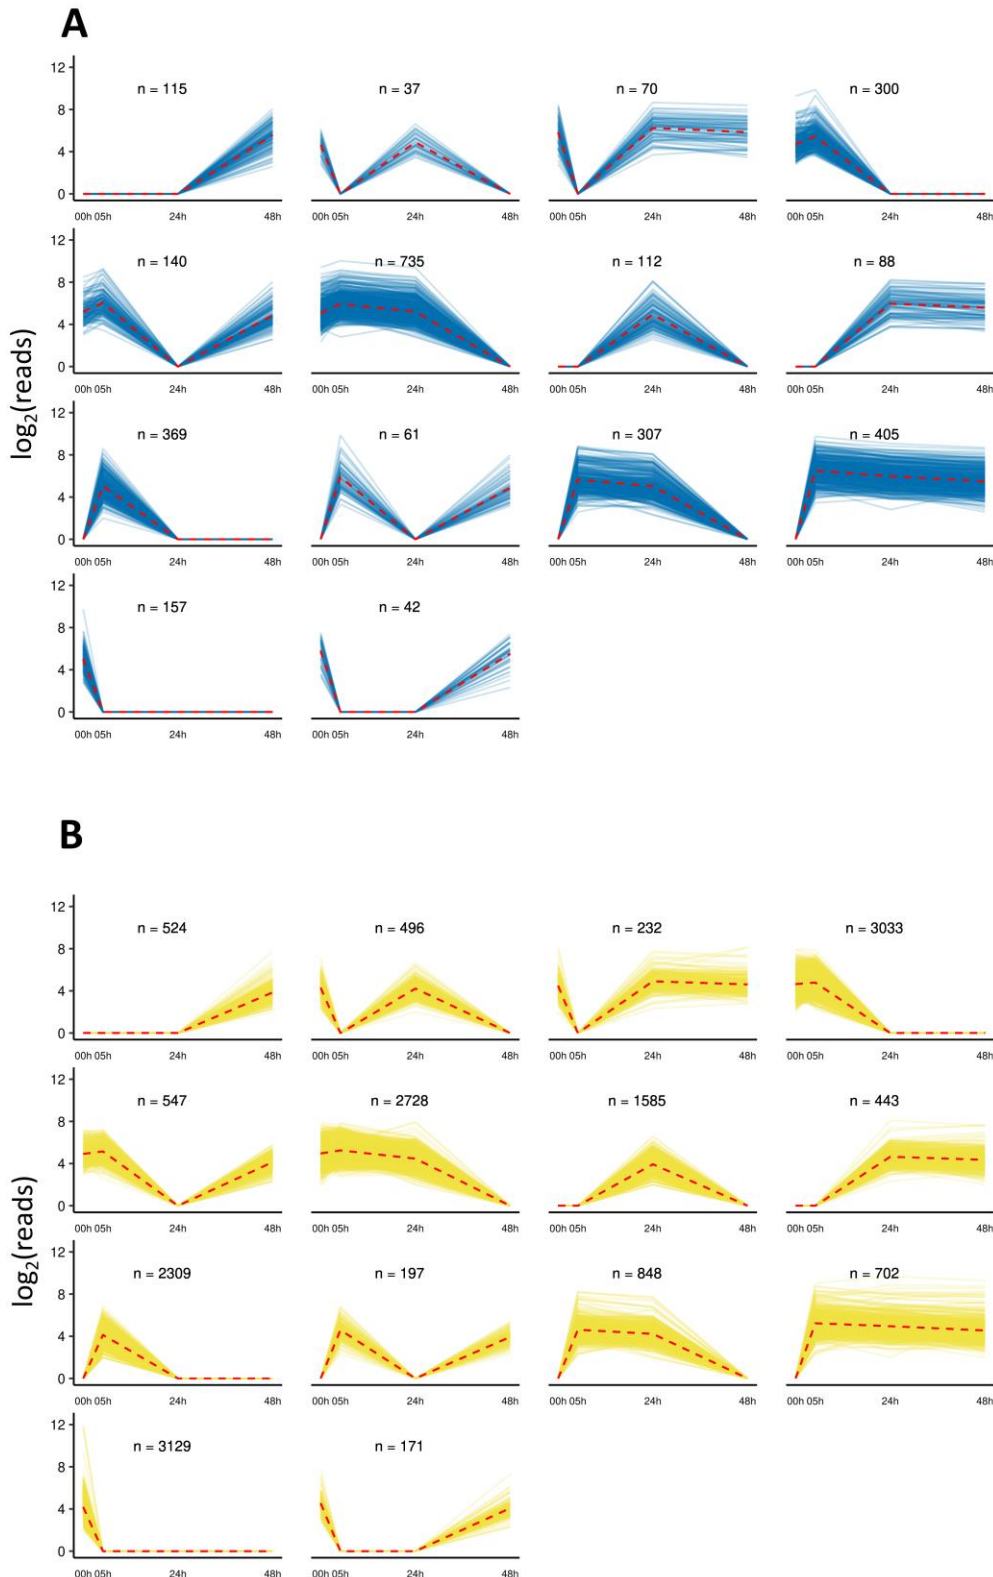

929

930 **Figure S3. Promoter-associated and intergenic ATAC peaks with complex dynamics.**  
931 (A) Promoters (blue). (B) intergenic regions (yellow). The size of each ATAC peak is plotted for  
932 every time point. Each line connects the points corresponding to the same genomic position where  
933 a peak was found.

934

|       | Sequence Logo                                                                     | p-value |         |         |        | % detection in peaks |        |        |        | % detection in random background |        |        |        |
|-------|-----------------------------------------------------------------------------------|---------|---------|---------|--------|----------------------|--------|--------|--------|----------------------------------|--------|--------|--------|
|       |                                                                                   | 1e-2126 | 1e-2418 | 1e-1180 | 1e-838 | 13.10%               | 15.75% | 12.62% | 12.60% | 2.58%                            | 3.62%  | 3.69%  | 3.86%  |
| CTCF  |  |         |         |         |        |                      |        |        |        |                                  |        |        |        |
| Fli1  |  | 1e-1907 | 1e-1705 | 1e-1440 | 1e-927 | 46.77%               | 52.81% | 52.66% | 52.05% | 25.77%                           | 32.94% | 32.56% | 33.46% |
| Spi1  |  | 1e-1615 | 1e-1427 | 1e-1427 | 1e-637 | 23.94%               | 27.60% | 26.33% | 23.90% | 9.68%                            | 13.40% | 12.48% | 12.37% |
| ERG   |  | 1e-1654 | 1e-1375 | 1e-1169 | 1e-667 | 53.49%               | 60.78% | 59.28% | 56.41% | 33.04%                           | 42.51% | 40.75% | 40.33% |
| RUNX1 |  | 1e-697  | 1e-452  | 1e-525  | 1e-327 | 29.49%               | 34.28% | 32.64% | 30.48% | 18.26%                           | 24.87% | 21.81% | 20.83% |
|       |                                                                                   | 0h      | 5h      | 24h     | 48h    | 0h                   | 5h     | 24h    | 48h    | 0h                               | 5h     | 24h    | 48h    |

935

936 **Figure S4. Enrichment of selected known hematopoiesis related transcription factor**  
 937 **binding motifs.**

938 At each time point, peak sequences were scanned by HOMER for “known motifs”. The motifs  
 939 five of the factors selected here showed the most significant enrichment. They are well known to  
 940 be associated with hematopoiesis and chromatin remodeling. For an extensive list of tested motifs  
 941 and statistics, see **Table S4.**

942

943
